# Supplementary material for: Emerging investigator series: calculating size- and coating-dependent effect factors for silver nanoparticles to inform characterization factor development for usage in life cycle assessment
Source: Royal Society of Chemistry journal article supplement (doi:10.1039/d0en00675k), 2020-01-01
Supplement: d0en00675k1.pdf [file d0en00675k1.pdf]

## **Supplemental Information**

### **Calculating size- and coating- dependent effect factors for silver nanoparticles to inform characterization factor development for usage in life cycle assessment**

Sila Temizel-Sekeryan<sup>a</sup>, Andrea L. Hicks<sup>a,\*</sup>

<sup>a</sup> Department of Civil and Environmental Engineering, University of Wisconsin-Madison,  
Madison, WI 53706, USA

\* Corresponding author: hicks5@wisc.edu, 2208 Engineering Hall, 1415 Engineering Drive,  
Madison, WI 53706, USA

*1 Table, 13 Figures, 15 pages*

## List of Tables

|                                                                                                                 |   |
|-----------------------------------------------------------------------------------------------------------------|---|
| Table S1. Number of papers disaggregated based on coating, test medium and size for each aquatic organism ..... | 5 |
|-----------------------------------------------------------------------------------------------------------------|---|

## List of Figures

|                                                                                                                                                       |    |
|-------------------------------------------------------------------------------------------------------------------------------------------------------|----|
| Figure S1. Species level (SPL) HC <sub>50</sub> calculation scheme .....                                                                              | 4  |
| Figure S2. Trophic level (TPL) HC <sub>50</sub> calculation scheme .....                                                                              | 4  |
| Figure S3. Number of toxicity data disaggregated by the test medium, nAg size and coating for A) crustaceans, B) algae, C) fish and D) protozoa ..... | 7  |
| Figure S4. Size versus Median L(E)C <sub>50</sub> values for crustaceans .....                                                                        | 8  |
| Figure S5. Size versus Median L(E)C <sub>50</sub> values for algae .....                                                                              | 8  |
| Figure S6. Size versus Median L(E)C <sub>50</sub> values for fish.....                                                                                | 9  |
| Figure S7. Size versus Median L(E)C <sub>50</sub> values for protozoa.....                                                                            | 9  |
| Figure S8. Effect factors (PAF.m <sup>3</sup> /kg) for PVP coated nAg based on size and test media.....                                               | 10 |
| Figure S9. Effect factors (PAF.m <sup>3</sup> /kg) for citrate coated nAg based on size and test media .....                                          | 11 |
| Figure S10. Effect factors (PAF.m <sup>3</sup> /kg) for uncoated nAg based on size and test media .....                                               | 12 |
| Figure S11. Effect factors (PAF.m <sup>3</sup> /kg) for nAg coated with other capping agents based on size and test media .....                       | 13 |
| Figure S12. Effect factors (PAF.m <sup>3</sup> /kg) for nAg based on size and test media regardless of coating.....                                   | 14 |
| Figure S13. Size dependent effect factors for different scenarios and respective trendlines .....                                                     | 15 |

## **Search Queries for Toxicity Literature Survey**

### **Crustaceans**

TOPIC ("toxicity" OR "LC50" OR "LC 50" OR "EC50" OR "EC 50" OR "acute" OR "chronic") AND ("crustaceans" OR "crustacean") AND ("silver nanoparticle" OR "silver nanoparticles" OR "nanosilver" OR "nano silver" OR "AgNP" OR "AgNPs" OR "nAg")

### **Algae**

TOPIC ("toxicity" OR "LC50" OR "LC 50" OR "EC50" OR "EC 50" OR "acute" OR "chronic") AND ("algae" OR "alga") AND ("silver nanoparticle" OR "silver nanoparticles" OR "nanosilver" OR "nano silver" OR "AgNP" OR "AgNPs" OR "nAg")

### **Fish**

TOPIC ("toxicity" OR "LC50" OR "LC 50" OR "EC50" OR "EC 50" OR "acute" OR "chronic") AND ("fish" OR "fishes") AND ("silver nanoparticle" OR "silver nanoparticles" OR "nanosilver" OR "nano silver" OR "AgNP" OR "AgNPs" OR "nAg")

### **Protozoa**

TOPIC ("toxicity" OR "LC50" OR "LC 50" OR "EC50" OR "EC 50") AND ("ciliate" OR "ciliates" OR "protozoa" OR "protozoan" OR "protozoans") AND ("silver nanoparticle" OR "silver nanoparticles" OR "nanosilver" OR "nano silver" OR "AgNP" OR "AgNPs" OR "nAg")

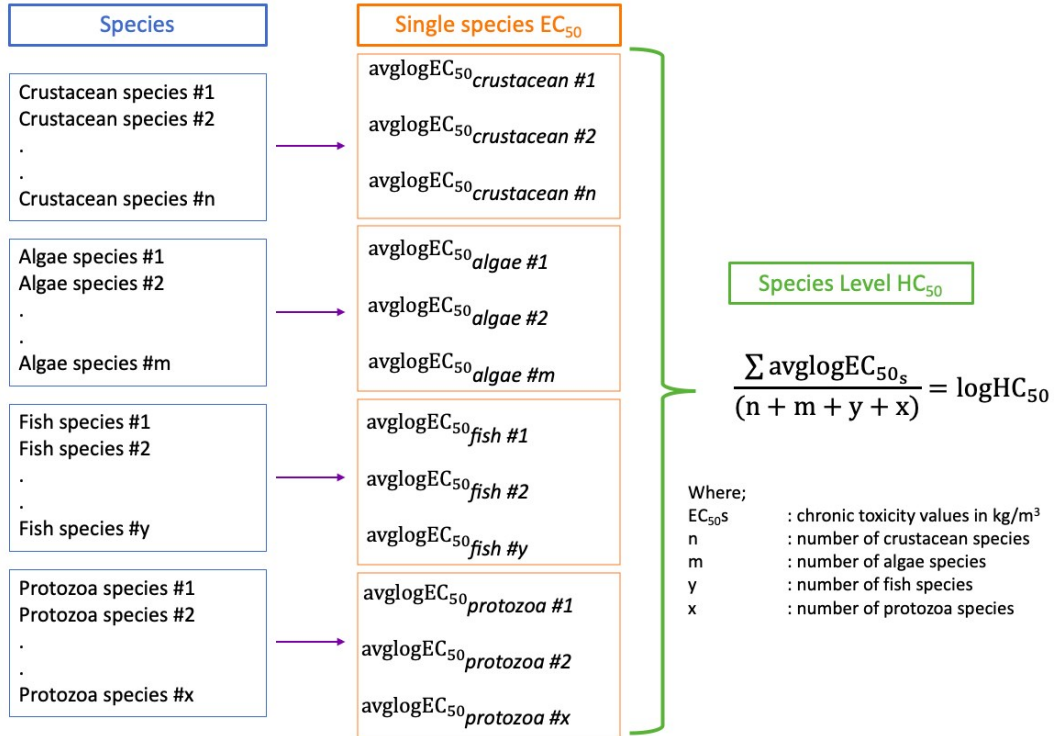

Figure S1. Species level (SPL) HC<sub>50</sub> calculation scheme

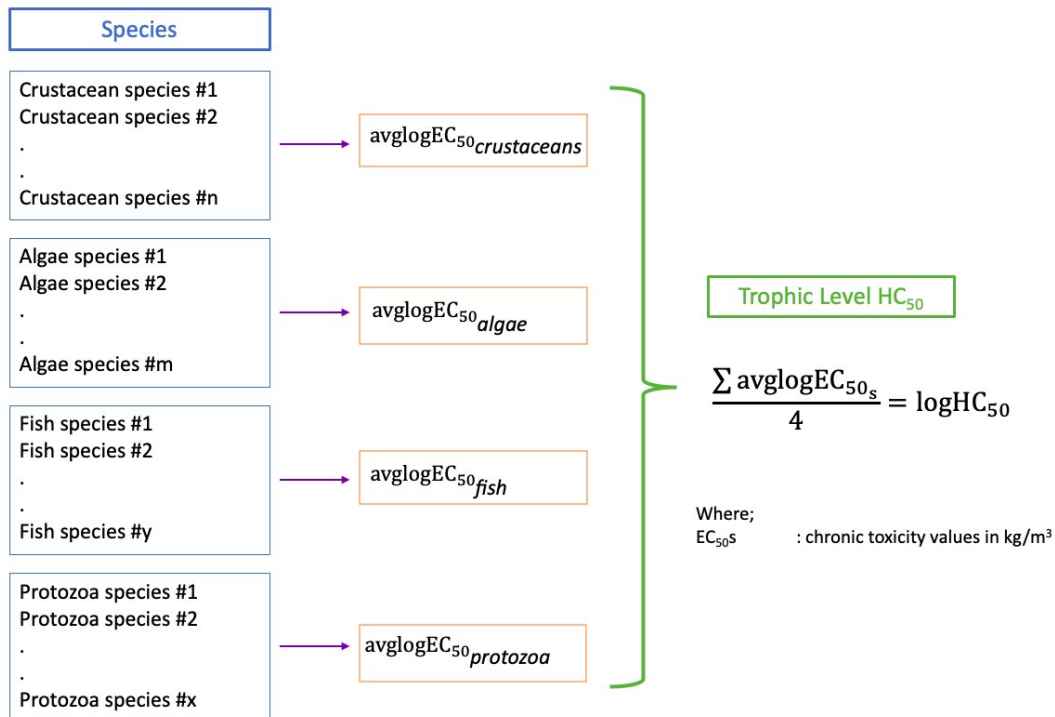

Figure S2. Trophic level (TPL) HC<sub>50</sub> calculation scheme

Table S1. Number of papers disaggregated based on coating, test medium and size for each aquatic organism

| Size (nm) | Organism | Water Medium |     |    |   |     | Mineral Medium |     |    |    |     | Complex Medium |     |    |   |     | Regardless of Medium |     |    |    |     |
|-----------|----------|--------------|-----|----|---|-----|----------------|-----|----|----|-----|----------------|-----|----|---|-----|----------------------|-----|----|----|-----|
|           |          | cit          | PVP | un | o | sum | cit            | PVP | un | o  | sum | cit            | PVP | un | o | sum | cit                  | PVP | un | o  | sum |
| 1-10      | C        | 0            | 0   | 1  | 0 | 1   | 9              | 2   | 6  | 10 | 27  | 2              | 7   | 0  | 0 | 9   | 11                   | 9   | 7  | 10 | 37  |
|           | A        | 0            | 1   | 0  | 0 | 1   | 5              | 1   | 3  | 6  | 15  | 0              | 1   | 0  | 0 | 1   | 5                    | 3   | 3  | 6  | 17  |
|           | F        | 0            | 1   | 4  | 0 | 5   | 6              | 0   | 2  | 3  | 11  | 2              | 0   | 0  | 0 | 2   | 8                    | 1   | 6  | 3  | 18  |
|           | P        | 0            | 0   | 2  | 0 | 2   | 0              | 0   | 0  | 0  | 0   | 0              | 0   | 0  | 1 | 1   | 0                    | 0   | 2  | 1  | 3   |
| 10.1-20   | C        | 2            | 2   | 0  | 6 | 10  | 5              | 7   | 8  | 7  | 27  | 1              | 0   | 0  | 6 | 7   | 8                    | 9   | 8  | 19 | 44  |
|           | A        | 0            | 0   | 0  | 6 | 6   | 9              | 0   | 15 | 2  | 26  | 3              | 0   | 0  | 0 | 3   | 12                   | 0   | 15 | 8  | 35  |
|           | F        | 0            | 0   | 14 | 1 | 15  | 1              | 5   | 11 | 3  | 20  | 6              | 0   | 6  | 0 | 12  | 7                    | 5   | 31 | 4  | 47  |
|           | P        | 0            | 0   | 0  | 2 | 2   | 0              | 0   | 0  | 0  | 0   | 0              | 0   | 2  | 0 | 2   | 0                    | 0   | 2  | 2  | 4   |
| 20.1-30   | C        | 1            | 0   | 0  | 5 | 6   | 4              | 4   | 4  | 4  | 16  | 1              | 1   | 5  | 0 | 7   | 6                    | 5   | 9  | 9  | 29  |
|           | A        | 0            | 0   | 0  | 0 | 0   | 6              | 3   | 3  | 10 | 22  | 0              | 0   | 2  | 0 | 2   | 6                    | 3   | 5  | 10 | 24  |
|           | F        | 0            | 4   | 0  | 0 | 4   | 1              | 3   | 4  | 4  | 12  | 0              | 1   | 0  | 0 | 1   | 1                    | 8   | 4  | 4  | 17  |
|           | P        | 0            | 0   | 0  | 0 | 0   | 0              | 2   | 0  | 0  | 2   | 0              | 0   | 0  | 0 | 0   | 0                    | 2   | 0  | 0  | 2   |
| 30.1-40   | C        | 2            | 1   | 0  | 1 | 4   | 3              | 0   | 7  | 3  | 13  | 1              | 0   | 0  | 0 | 1   | 6                    | 1   | 7  | 4  | 18  |
|           | A        | 0            | 0   | 0  | 0 | 0   | 1              | 0   | 4  | 2  | 7   | 0              | 0   | 0  | 0 | 0   | 1                    | 0   | 4  | 2  | 7   |
|           | F        | 0            | 0   | 0  | 0 | 0   | 0              | 0   | 4  | 1  | 5   | 0              | 0   | 0  | 0 | 0   | 0                    | 0   | 4  | 1  | 5   |
|           | P        | 0            | 2   | 2  | 1 | 5   | 0              | 0   | 0  | 0  | 0   | 0              | 0   | 0  | 0 | 0   | 0                    | 2   | 2  | 1  | 5   |
| 40.1-50   | C        | 0            | 0   | 0  | 0 | 0   | 0              | 2   | 3  | 0  | 5   | 0              | 0   | 0  | 0 | 0   | 0                    | 2   | 3  | 0  | 5   |
|           | A        | 0            | 0   | 0  | 0 | 0   | 0              | 1   | 3  | 2  | 6   | 0              | 0   | 0  | 0 | 0   | 0                    | 1   | 3  | 2  | 6   |
|           | F        | 0            | 0   | 2  | 0 | 2   | 2              | 1   | 6  | 2  | 11  | 0              | 1   | 3  | 0 | 4   | 2                    | 2   | 11 | 2  | 17  |
|           | P        | 0            | 0   | 0  | 0 | 0   | 0              | 0   | 0  | 0  | 0   | 0              | 0   | 0  | 0 | 0   | 0                    | 0   | 0  | 0  | 0   |
| 50.1-60   | C        | 1            | 0   | 0  | 0 | 1   | 5              | 1   | 1  | 0  | 7   | 0              | 0   | 0  | 0 | 0   | 6                    | 1   | 1  | 0  | 8   |
|           | A        | 0            | 0   | 0  | 0 | 0   | 1              | 5   | 0  | 0  | 6   | 0              | 0   | 0  | 0 | 0   | 1                    | 5   | 0  | 0  | 6   |
|           | F        | 0            | 0   | 0  | 0 | 0   | 0              | 7   | 2  | 2  | 11  | 0              | 0   | 0  | 0 | 0   | 0                    | 7   | 2  | 2  | 11  |
|           | P        | 0            | 0   | 0  | 0 | 0   | 0              | 0   | 0  | 0  | 0   | 0              | 0   | 0  | 0 | 0   | 0                    | 0   | 0  | 0  | 0   |

|          |   |   |   |   |   |    |   |   |   |   |    |   |   |   |   |   |   |   |   |   |    |
|----------|---|---|---|---|---|----|---|---|---|---|----|---|---|---|---|---|---|---|---|---|----|
| 60.1-70  | C | 1 | 0 | 0 | 0 | 1  | 1 | 2 | 0 | 3 | 6  | 0 | 0 | 0 | 0 | 0 | 2 | 2 | 0 | 3 | 7  |
|          | A | 0 | 0 | 0 | 0 | 0  | 1 | 0 | 2 | 4 | 7  | 0 | 0 | 0 | 0 | 0 | 1 | 0 | 2 | 4 | 7  |
|          | F | 0 | 0 | 4 | 0 | 4  | 0 | 0 | 0 | 1 | 1  | 0 | 0 | 0 | 0 | 0 | 0 | 0 | 4 | 1 | 5  |
|          | P | 0 | 0 | 0 | 0 | 0  | 0 | 0 | 0 | 0 | 0  | 0 | 0 | 0 | 0 | 0 | 0 | 0 | 0 | 0 | 0  |
| 70.1-80  | C | 1 | 0 | 0 | 0 | 1  | 3 | 1 | 4 | 0 | 8  | 0 | 0 | 0 | 1 | 1 | 4 | 1 | 4 | 1 | 10 |
|          | A | 0 | 0 | 0 | 0 | 0  | 1 | 1 | 0 | 0 | 2  | 0 | 0 | 0 | 0 | 0 | 1 | 1 | 0 | 0 | 2  |
|          | F | 1 | 0 | 1 | 0 | 2  | 0 | 1 | 4 | 0 | 5  | 0 | 0 | 0 | 1 | 1 | 1 | 1 | 5 | 1 | 8  |
|          | P | 0 | 0 | 0 | 0 | 0  | 0 | 0 | 1 | 0 | 1  | 0 | 0 | 0 | 0 | 0 | 0 | 0 | 1 | 0 | 1  |
| 80.1-90  | C | 0 | 0 | 0 | 0 | 0  | 0 | 0 | 0 | 0 | 0  | 0 | 0 | 0 | 0 | 0 | 0 | 0 | 0 | 0 | 0  |
|          | A | 0 | 0 | 0 | 0 | 0  | 0 | 1 | 1 | 0 | 2  | 0 | 0 | 0 | 0 | 0 | 0 | 1 | 1 | 0 | 2  |
|          | F | 0 | 0 | 0 | 0 | 0  | 0 | 2 | 5 | 0 | 7  | 0 | 0 | 0 | 0 | 0 | 0 | 2 | 5 | 0 | 7  |
|          | P | 0 | 0 | 0 | 0 | 0  | 0 | 0 | 0 | 0 | 0  | 0 | 0 | 0 | 0 | 0 | 0 | 0 | 0 | 0 | 0  |
| 90.1-100 | C | 0 | 0 | 1 | 0 | 1  | 1 | 0 | 1 | 1 | 3  | 1 | 0 | 0 | 0 | 1 | 2 | 0 | 2 | 1 | 5  |
|          | A | 0 | 0 | 0 | 0 | 0  | 0 | 0 | 0 | 0 | 0  | 0 | 0 | 0 | 0 | 0 | 0 | 0 | 0 | 0 | 0  |
|          | F | 1 | 6 | 8 | 0 | 15 | 0 | 1 | 0 | 1 | 2  | 0 | 0 | 0 | 0 | 0 | 1 | 7 | 8 | 1 | 17 |
|          | P | 0 | 0 | 2 | 0 | 2  | 0 | 0 | 0 | 0 | 0  | 0 | 0 | 0 | 0 | 0 | 0 | 0 | 2 | 0 | 2  |
| >100     | C | 1 | 1 | 0 | 2 | 4  | 1 | 0 | 6 | 1 | 8  | 0 | 0 | 1 | 0 | 1 | 2 | 1 | 7 | 3 | 13 |
|          | A | 0 | 0 | 0 | 0 | 0  | 0 | 0 | 2 | 1 | 3  | 0 | 1 | 0 | 0 | 1 | 0 | 1 | 2 | 1 | 4  |
|          | F | 0 | 0 | 4 | 0 | 4  | 2 | 3 | 2 | 4 | 11 | 0 | 1 | 0 | 0 | 1 | 2 | 4 | 6 | 4 | 16 |
|          | P | 0 | 0 | 0 | 0 | 0  | 0 | 0 | 0 | 0 | 0  | 0 | 0 | 0 | 0 | 0 | 0 | 0 | 0 | 0 | 0  |

C: crustaceans, A: algae, F: fish, P: protozoa, cit: citrate coated, PVP: polyvinylpyrrolidone, un: uncoated, o: other coatings, sum: regardless of coating

| A) Crustaceans |         |     |          |       |         |     |          |       |         |     |          |       |                             |     |          |       |                                |         |         |           |
|----------------|---------|-----|----------|-------|---------|-----|----------|-------|---------|-----|----------|-------|-----------------------------|-----|----------|-------|--------------------------------|---------|---------|-----------|
| nAg size       | Water   |     |          |       | Mineral |     |          |       | Complex |     |          |       | All Media (i.e. regardless) |     |          |       | All coatings (i.e. regardless) |         |         |           |
|                | Citrate | PVP | Uncoated | Other | Citrate | PVP | Uncoated | Other | Citrate | PVP | Uncoated | Other | Citrate                     | PVP | Uncoated | Other | Water                          | Mineral | Complex | All Media |
| 1-10           | 0       | 0   | 1        | 0     | 9       | 2   | 6        | 10    | 2       | 7   | 0        | 0     | 11                          | 9   | 7        | 10    | 1                              | 27      | 9       | 37        |
| 10.1-20        | 2       | 2   | 0        | 6     | 5       | 7   | 8        | 7     | 1       | 0   | 0        | 6     | 8                           | 9   | 8        | 19    | 10                             | 27      | 7       | 44        |
| 20.1-30        | 1       | 0   | 0        | 5     | 4       | 4   | 4        | 4     | 1       | 1   | 5        | 0     | 6                           | 5   | 9        | 9     | 6                              | 16      | 7       | 29        |
| 30.1-40        | 2       | 1   | 0        | 1     | 3       | 0   | 7        | 3     | 1       | 0   | 0        | 0     | 6                           | 1   | 7        | 4     | 4                              | 13      | 1       | 18        |
| 40.1-50        | 0       | 0   | 0        | 0     | 5       | 1   | 1        | 0     | 0       | 0   | 0        | 0     | 0                           | 2   | 3        | 0     | 0                              | 7       | 0       | 5         |
| 50.1-60        | 1       | 0   | 0        | 0     | 5       | 1   | 1        | 0     | 0       | 0   | 0        | 0     | 6                           | 1   | 1        | 0     | 1                              | 7       | 0       | 8         |
| 60.1-70        | 1       | 0   | 0        | 0     | 1       | 2   | 0        | 3     | 0       | 0   | 0        | 0     | 2                           | 2   | 0        | 3     | 1                              | 6       | 0       | 7         |
| 70.1-80        | 1       | 0   | 0        | 0     | 1       | 1   | 0        | 0     | 0       | 0   | 0        | 1     | 4                           | 1   | 4        | 1     | 1                              | 2       | 1       | 10        |
| 80.1-90        | 0       | 0   | 0        | 0     | 0       | 0   | 0        | 0     | 0       | 0   | 0        | 0     | 0                           | 0   | 0        | 0     | 0                              | 0       | 0       | 0         |
| 90.1-100       | 0       | 0   | 1        | 0     | 1       | 0   | 1        | 1     | 1       | 0   | 0        | 0     | 2                           | 0   | 2        | 1     | 1                              | 3       | 1       | 5         |
| >100           | 1       | 1   | 0        | 2     | 1       | 0   | 6        | 1     | 0       | 0   | 1        | 0     | 2                           | 1   | 7        | 3     | 4                              | 8       | 1       | 13        |

| B) Algae |         |     |          |       |         |     |          |       |         |     |          |       |                             |     |          |       |                                |         |         |           |
|----------|---------|-----|----------|-------|---------|-----|----------|-------|---------|-----|----------|-------|-----------------------------|-----|----------|-------|--------------------------------|---------|---------|-----------|
| nAg size | Water   |     |          |       | Mineral |     |          |       | Complex |     |          |       | All Media (i.e. regardless) |     |          |       | All coatings (i.e. regardless) |         |         |           |
|          | Citrate | PVP | Uncoated | Other | Citrate | PVP | Uncoated | Other | Citrate | PVP | Uncoated | Other | Citrate                     | PVP | Uncoated | Other | Water                          | Mineral | Complex | All Media |
| 1-10     | 0       | 1   | 0        | 0     | 5       | 1   | 3        | 6     | 0       | 1   | 0        | 0     | 5                           | 3   | 3        | 6     | 1                              | 15      | 1       | 17        |
| 10.1-20  | 0       | 0   | 0        | 6     | 9       | 0   | 15       | 2     | 3       | 0   | 0        | 0     | 12                          | 0   | 15       | 8     | 6                              | 26      | 3       | 35        |
| 20.1-30  | 0       | 0   | 0        | 0     | 6       | 3   | 3        | 10    | 0       | 0   | 2        | 0     | 6                           | 3   | 5        | 10    | 0                              | 22      | 2       | 24        |
| 30.1-40  | 0       | 0   | 0        | 0     | 1       | 0   | 4        | 2     | 0       | 0   | 0        | 0     | 1                           | 0   | 4        | 2     | 0                              | 7       | 0       | 7         |
| 40.1-50  | 0       | 0   | 0        | 0     | 0       | 1   | 3        | 2     | 0       | 0   | 0        | 0     | 0                           | 1   | 3        | 2     | 0                              | 6       | 0       | 6         |
| 50.1-60  | 0       | 0   | 0        | 0     | 1       | 5   | 0        | 0     | 0       | 0   | 0        | 0     | 1                           | 5   | 0        | 0     | 0                              | 6       | 0       | 6         |
| 60.1-70  | 0       | 0   | 0        | 0     | 1       | 0   | 2        | 4     | 0       | 0   | 0        | 0     | 1                           | 0   | 2        | 4     | 0                              | 7       | 0       | 7         |
| 70.1-80  | 0       | 0   | 0        | 0     | 1       | 1   | 0        | 0     | 0       | 0   | 0        | 0     | 1                           | 1   | 0        | 0     | 0                              | 2       | 0       | 2         |
| 80.1-90  | 0       | 0   | 0        | 0     | 0       | 1   | 1        | 0     | 0       | 0   | 0        | 0     | 0                           | 1   | 1        | 0     | 0                              | 2       | 0       | 2         |
| 90.1-100 | 0       | 0   | 0        | 0     | 0       | 0   | 0        | 0     | 0       | 0   | 0        | 0     | 0                           | 0   | 0        | 0     | 0                              | 0       | 0       | 0         |
| >100     | 0       | 0   | 0        | 0     | 0       | 0   | 2        | 1     | 0       | 1   | 0        | 0     | 0                           | 1   | 2        | 1     | 0                              | 3       | 1       | 4         |

| C) Fish  |         |     |          |       |         |     |          |       |         |     |          |       |                             |     |          |       |                                |         |         |           |
|----------|---------|-----|----------|-------|---------|-----|----------|-------|---------|-----|----------|-------|-----------------------------|-----|----------|-------|--------------------------------|---------|---------|-----------|
| nAg size | Water   |     |          |       | Mineral |     |          |       | Complex |     |          |       | All Media (i.e. regardless) |     |          |       | All coatings (i.e. regardless) |         |         |           |
|          | Citrate | PVP | Uncoated | Other | Citrate | PVP | Uncoated | Other | Citrate | PVP | Uncoated | Other | Citrate                     | PVP | Uncoated | Other | Water                          | Mineral | Complex | All Media |
| 1-10     | 0       | 1   | 4        | 0     | 6       | 0   | 2        | 3     | 2       | 0   | 0        | 0     | 8                           | 1   | 6        | 3     | 5                              | 11      | 2       | 18        |
| 10.1-20  | 0       | 0   | 14       | 1     | 1       | 5   | 11       | 3     | 6       | 0   | 6        | 0     | 7                           | 5   | 31       | 4     | 15                             | 20      | 12      | 47        |
| 20.1-30  | 0       | 4   | 0        | 0     | 1       | 3   | 4        | 4     | 0       | 1   | 0        | 0     | 1                           | 8   | 4        | 4     | 4                              | 12      | 1       | 17        |
| 30.1-40  | 0       | 0   | 0        | 0     | 0       | 0   | 4        | 1     | 0       | 0   | 0        | 0     | 0                           | 0   | 4        | 1     | 0                              | 5       | 0       | 5         |
| 40.1-50  | 0       | 0   | 2        | 0     | 2       | 1   | 6        | 2     | 0       | 1   | 3        | 0     | 2                           | 2   | 11       | 2     | 2                              | 11      | 4       | 17        |
| 50.1-60  | 0       | 0   | 0        | 0     | 0       | 7   | 2        | 2     | 0       | 0   | 0        | 0     | 0                           | 7   | 2        | 2     | 0                              | 11      | 0       | 11        |
| 60.1-70  | 0       | 0   | 4        | 0     | 0       | 0   | 0        | 1     | 0       | 0   | 0        | 0     | 0                           | 0   | 4        | 1     | 4                              | 1       | 0       | 5         |
| 70.1-80  | 1       | 0   | 1        | 0     | 0       | 1   | 4        | 0     | 0       | 0   | 0        | 1     | 1                           | 1   | 5        | 1     | 2                              | 5       | 1       | 8         |
| 80.1-90  | 0       | 0   | 0        | 0     | 0       | 2   | 5        | 0     | 0       | 0   | 0        | 0     | 0                           | 2   | 5        | 0     | 0                              | 7       | 0       | 7         |
| 90.1-100 | 1       | 6   | 8        | 0     | 0       | 1   | 0        | 1     | 0       | 0   | 0        | 0     | 1                           | 7   | 8        | 1     | 15                             | 2       | 0       | 17        |
| >100     | 0       | 0   | 4        | 0     | 2       | 3   | 2        | 4     | 0       | 1   | 0        | 0     | 2                           | 4   | 6        | 4     | 4                              | 11      | 1       | 16        |

| D) Protozoa |         |     |          |       |         |     |          |       |         |     |          |       |                             |     |          |       |                                |         |         |           |
|-------------|---------|-----|----------|-------|---------|-----|----------|-------|---------|-----|----------|-------|-----------------------------|-----|----------|-------|--------------------------------|---------|---------|-----------|
| nAg size    | Water   |     |          |       | Mineral |     |          |       | Complex |     |          |       | All Media (i.e. regardless) |     |          |       | All coatings (i.e. regardless) |         |         |           |
|             | Citrate | PVP | Uncoated | Other | Citrate | PVP | Uncoated | Other | Citrate | PVP | Uncoated | Other | Citrate                     | PVP | Uncoated | Other | Water                          | Mineral | Complex | All Media |
| 1-10        | 0       | 0   | 2        | 0     | 0       | 0   | 0        | 0     | 0       | 0   | 0        | 1     | 0                           | 0   | 2        | 1     | 2                              | 0       | 1       | 3         |
| 10.1-20     | 0       | 0   | 0        | 2     | 0       | 0   | 0        | 0     | 0       | 0   | 2        | 0     | 0                           | 0   | 2        | 2     | 2                              | 0       | 2       | 4         |
| 20.1-30     | 0       | 0   | 0        | 0     | 0       | 2   | 0        | 0     | 0       | 0   | 0        | 0     | 0                           | 2   | 0        | 0     | 0                              | 2       | 0       | 2         |
| 30.1-40     | 0       | 2   | 2        | 1     | 0       | 0   | 0        | 0     | 0       | 0   | 0        | 0     | 0                           | 2   | 2        | 1     | 5                              | 0       | 0       | 5         |
| 40.1-50     | 0       | 0   | 0        | 0     | 0       | 0   | 0        | 0     | 0       | 0   | 0        | 0     | 0                           | 0   | 0        | 0     | 0                              | 0       | 0       | 0         |
| 50.1-60     | 0       | 0   | 0        | 0     | 0       | 0   | 0        | 0     | 0       | 0   | 0        | 0     | 0                           | 0   | 0        | 0     | 0                              | 0       | 0       | 0         |
| 60.1-70     | 0       | 0   | 0        | 0     | 0       | 0   | 0        | 0     | 0       | 0   | 0        | 0     | 0                           | 0   | 0        | 0     | 0                              | 0       | 0       | 0         |
| 70.1-80     | 0       | 0   | 0        | 0     | 0       | 0   | 1        | 0     | 0       | 0   | 0        | 0     | 0                           | 0   | 1        | 0     | 0                              | 1       | 0       | 1         |
| 80.1-90     | 0       | 0   | 0        | 0     | 0       | 0   | 0        | 0     | 0       | 0   | 0        | 0     | 0                           | 0   | 0        | 0     | 0                              | 0       | 0       | 0         |
| 90.1-100    | 0       | 0   | 2        | 0     | 0       | 0   | 0        | 0     | 0       | 0   | 0        | 0     | 0                           | 0   | 2        | 0     | 2                              | 0       | 0       | 2         |
| >100        | 0       | 0   | 0        | 0     | 0       | 0   | 0        | 0     | 0       | 0   | 0        | 0     | 0                           | 0   | 0        | 0     | 0                              | 0       | 0       | 0         |

Figure S3. Number of toxicity data disaggregated by the test medium, nAg size and coating for

A) crustaceans, B) algae, C) fish and D) protozoa

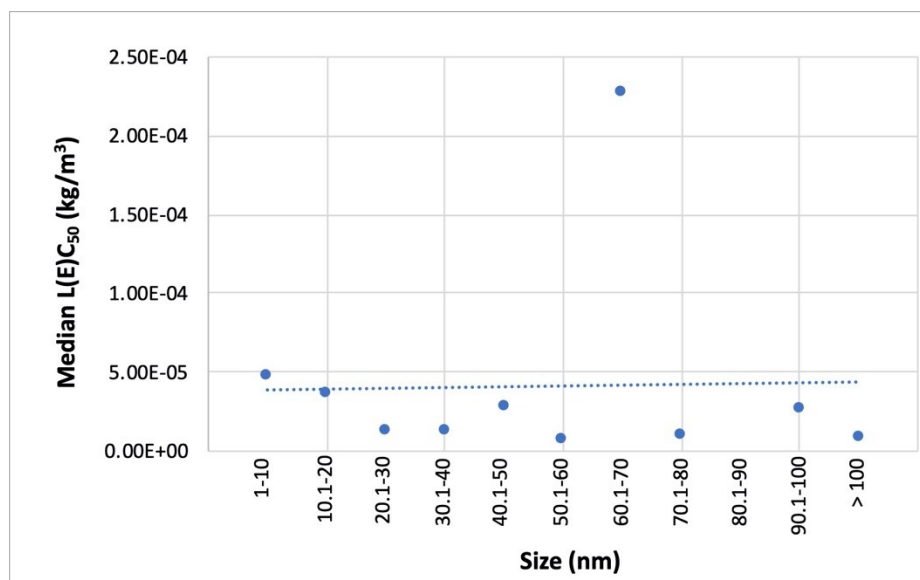

Figure S4. Size versus Median L(E)C<sub>50</sub> values for crustaceans

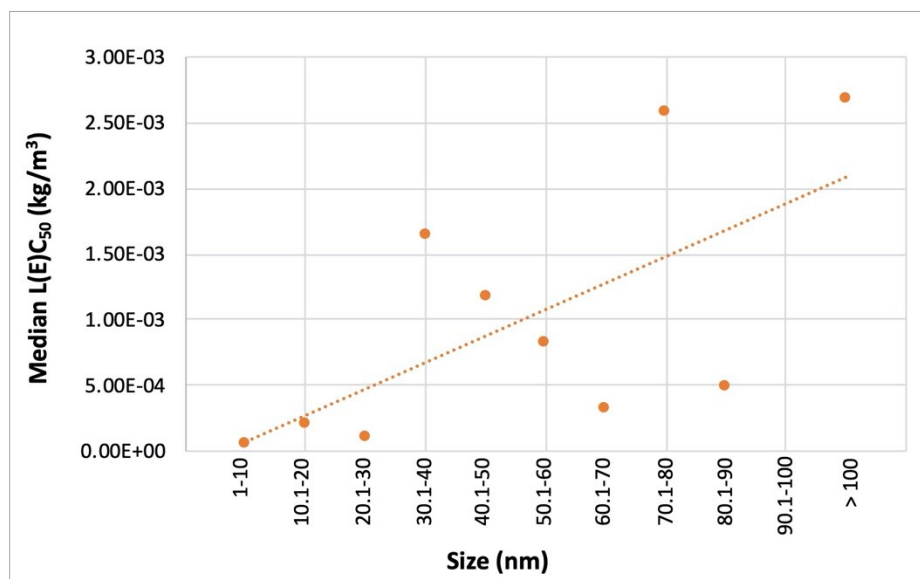

Figure S5. Size versus Median L(E)C<sub>50</sub> values for algae



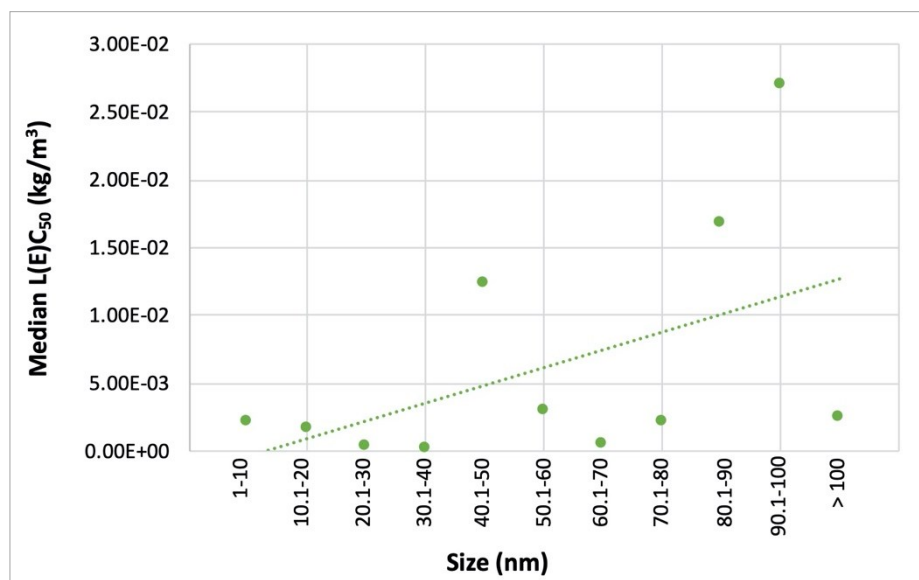

Figure S6. Size versus Median L(E)C<sub>50</sub> values for fish

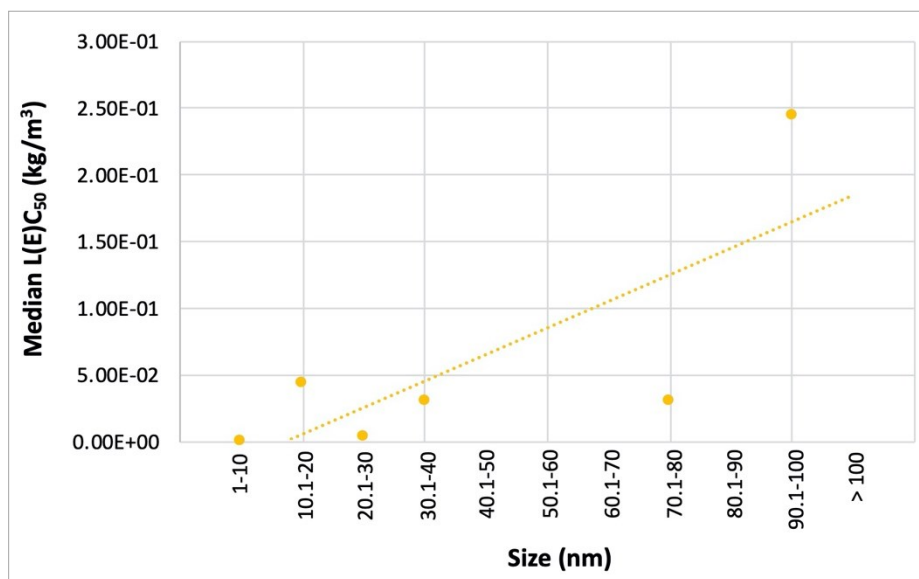

Figure S7. Size versus Median L(E)C<sub>50</sub> values for protozoa

**COATING: PVP**

|                     | 1-10 nm | 10.1-20 nm | 20.1-30 nm | 30.1-40 nm | 40.1-50 nm | 50.1-60 nm | 60.1-70 nm | 70.1-80 nm | 80.1-90 nm | 90.1-100 nm | > 100 nm | All sizes |
|---------------------|---------|------------|------------|------------|------------|------------|------------|------------|------------|-------------|----------|-----------|
| A) Water            | RCS CCS | RCS CCS    | RCS CCS    | RCS CCS    | RCS CCS    | RCS CCS    | RCS CCS    | RCS CCS    | RCS CCS    | RCS CCS     | RCS CCS  | RCS CCS   |
|                     | TPL SPL | TPL SPL    | TPL SPL    | TPL SPL    | TPL SPL    | TPL SPL    | TPL SPL    | TPL SPL    | TPL SPL    | TPL SPL     | TPL SPL  | TPL SPL   |
| B) Mineral Medium   | RCS CCS | RCS CCS    | RCS CCS    | RCS CCS    | RCS CCS    | RCS CCS    | RCS CCS    | RCS CCS    | RCS CCS    | RCS CCS     | RCS CCS  | RCS CCS   |
|                     | TPL SPL | TPL SPL    | TPL SPL    | TPL SPL    | TPL SPL    | TPL SPL    | TPL SPL    | TPL SPL    | TPL SPL    | TPL SPL     | TPL SPL  | TPL SPL   |
| C) Complex Medium   | RCS CCS | RCS CCS    | RCS CCS    | RCS CCS    | RCS CCS    | RCS CCS    | RCS CCS    | RCS CCS    | RCS CCS    | RCS CCS     | RCS CCS  | RCS CCS   |
|                     | TPL SPL | TPL SPL    | TPL SPL    | TPL SPL    | TPL SPL    | TPL SPL    | TPL SPL    | TPL SPL    | TPL SPL    | TPL SPL     | TPL SPL  | TPL SPL   |
| D) All test mediums | RCS CCS | RCS CCS    | RCS CCS    | RCS CCS    | RCS CCS    | RCS CCS    | RCS CCS    | RCS CCS    | RCS CCS    | RCS CCS     | RCS CCS  | RCS CCS   |
|                     | TPL SPL | TPL SPL    | TPL SPL    | TPL SPL    | TPL SPL    | TPL SPL    | TPL SPL    | TPL SPL    | TPL SPL    | TPL SPL     | TPL SPL  | TPL SPL   |

N/A: not enough data for calculation were available, therefore the corresponding EF could not be calculated.

Figure S8. Effect factors (PAF.m<sup>3</sup>/kg) for PVP coated nAg based on size and test media

**COATING: Citrate**

|                     | 1-10 nm | 10.1-20 nm | 20.1-30 nm | 30.1-40 nm | 40.1-50 nm | 50.1-60 nm | 60.1-70 nm | 70.1-80 nm | 80.1-90 nm | 90.1-100 nm | > 100 nm | All sizes |
|---------------------|---------|------------|------------|------------|------------|------------|------------|------------|------------|-------------|----------|-----------|
| A) Water            | RCS CCS | RCS CCS    | RCS CCS    | RCS CCS    | RCS CCS    | RCS CCS    | RCS CCS    | RCS CCS    | RCS CCS    | RCS CCS     | RCS CCS  | RCS CCS   |
|                     | TPL SPL | TPL SPL    | TPL SPL    | TPL SPL    | TPL SPL    | TPL SPL    | TPL SPL    | TPL SPL    | TPL SPL    | TPL SPL     | TPL SPL  | TPL SPL   |
| B) Mineral Medium   | RCS CCS | RCS CCS    | RCS CCS    | RCS CCS    | RCS CCS    | RCS CCS    | RCS CCS    | RCS CCS    | RCS CCS    | RCS CCS     | RCS CCS  | RCS CCS   |
|                     | TPL SPL | TPL SPL    | TPL SPL    | TPL SPL    | TPL SPL    | TPL SPL    | TPL SPL    | TPL SPL    | TPL SPL    | TPL SPL     | TPL SPL  | TPL SPL   |
| C) Complex Medium   | RCS CCS | RCS CCS    | RCS CCS    | RCS CCS    | RCS CCS    | RCS CCS    | RCS CCS    | RCS CCS    | RCS CCS    | RCS CCS     | RCS CCS  | RCS CCS   |
|                     | TPL SPL | TPL SPL    | TPL SPL    | TPL SPL    | TPL SPL    | TPL SPL    | TPL SPL    | TPL SPL    | TPL SPL    | TPL SPL     | TPL SPL  | TPL SPL   |
| D) All test mediums | RCS CCS | RCS CCS    | RCS CCS    | RCS CCS    | RCS CCS    | RCS CCS    | RCS CCS    | RCS CCS    | RCS CCS    | RCS CCS     | RCS CCS  | RCS CCS   |
|                     | TPL SPL | TPL SPL    | TPL SPL    | TPL SPL    | TPL SPL    | TPL SPL    | TPL SPL    | TPL SPL    | TPL SPL    | TPL SPL     | TPL SPL  | TPL SPL   |

N/A: not enough data for calculation were available, therefore the corresponding EF could not be calculated.

Figure S9. Effect factors (PAF.m<sup>3</sup>/kg) for citrate coated nAg based on size and test media

**COATING: Uncoated**

|                     | 1-10 nm | 10.1-20 nm | 20.1-30 nm | 30.1-40 nm | 40.1-50 nm | 50.1-60 nm | 60.1-70 nm | 70.1-80 nm | 80.1-90 nm | 90.1-100 nm | > 100 nm | All sizes |
|---------------------|---------|------------|------------|------------|------------|------------|------------|------------|------------|-------------|----------|-----------|
| A) Water            | RCS CCS | RCS CCS    | RCS CCS    | RCS CCS    | RCS CCS    | RCS CCS    | RCS CCS    | RCS CCS    | RCS CCS    | RCS CCS     | RCS CCS  | RCS CCS   |
|                     | TPL SPL | TPL SPL    | TPL SPL    | TPL SPL    | TPL SPL    | TPL SPL    | TPL SPL    | TPL SPL    | TPL SPL    | TPL SPL     | TPL SPL  | TPL SPL   |
| B) Mineral Medium   | RCS CCS | RCS CCS    | RCS CCS    | RCS CCS    | RCS CCS    | RCS CCS    | RCS CCS    | RCS CCS    | RCS CCS    | RCS CCS     | RCS CCS  | RCS CCS   |
|                     | TPL SPL | TPL SPL    | TPL SPL    | TPL SPL    | TPL SPL    | TPL SPL    | TPL SPL    | TPL SPL    | TPL SPL    | TPL SPL     | TPL SPL  | TPL SPL   |
| C) Complex Medium   | RCS CCS | RCS CCS    | RCS CCS    | RCS CCS    | RCS CCS    | RCS CCS    | RCS CCS    | RCS CCS    | RCS CCS    | RCS CCS     | RCS CCS  | RCS CCS   |
|                     | TPL SPL | TPL SPL    | TPL SPL    | TPL SPL    | TPL SPL    | TPL SPL    | TPL SPL    | TPL SPL    | TPL SPL    | TPL SPL     | TPL SPL  | TPL SPL   |
| D) All test mediums | RCS CCS | RCS CCS    | RCS CCS    | RCS CCS    | RCS CCS    | RCS CCS    | RCS CCS    | RCS CCS    | RCS CCS    | RCS CCS     | RCS CCS  | RCS CCS   |
|                     | TPL SPL | TPL SPL    | TPL SPL    | TPL SPL    | TPL SPL    | TPL SPL    | TPL SPL    | TPL SPL    | TPL SPL    | TPL SPL     | TPL SPL  | TPL SPL   |

N/A: not enough data for calculation were available, therefore the corresponding EF could not be calculated.

Figure S10. Effect factors (PAF.m<sup>3</sup>/kg) for uncoated nAg based on size and test media



**COATING: Other**

|                     | 1-10 nm | 10.1-20 nm | 20.1-30 nm | 30.1-40 nm | 40.1-50 nm | 50.1-60 nm | 60.1-70 nm | 70.1-80 nm | 80.1-90 nm | 90.1-100 nm | > 100 nm | All sizes |
|---------------------|---------|------------|------------|------------|------------|------------|------------|------------|------------|-------------|----------|-----------|
| A) Water            | RCS CCS | RCS CCS    | RCS CCS    | RCS CCS    | RCS CCS    | RCS CCS    | RCS CCS    | RCS CCS    | RCS CCS    | RCS CCS     | RCS CCS  | RCS CCS   |
|                     | TPL SPL | TPL SPL    | TPL SPL    | TPL SPL    | TPL SPL    | TPL SPL    | TPL SPL    | TPL SPL    | TPL SPL    | TPL SPL     | TPL SPL  | TPL SPL   |
| B) Mineral Medium   | RCS CCS | RCS CCS    | RCS CCS    | RCS CCS    | RCS CCS    | RCS CCS    | RCS CCS    | RCS CCS    | RCS CCS    | RCS CCS     | RCS CCS  | RCS CCS   |
|                     | TPL SPL | TPL SPL    | TPL SPL    | TPL SPL    | TPL SPL    | TPL SPL    | TPL SPL    | TPL SPL    | TPL SPL    | TPL SPL     | TPL SPL  | TPL SPL   |
| C) Complex Medium   | RCS CCS | RCS CCS    | RCS CCS    | RCS CCS    | RCS CCS    | RCS CCS    | RCS CCS    | RCS CCS    | RCS CCS    | RCS CCS     | RCS CCS  | RCS CCS   |
|                     | TPL SPL | TPL SPL    | TPL SPL    | TPL SPL    | TPL SPL    | TPL SPL    | TPL SPL    | TPL SPL    | TPL SPL    | TPL SPL     | TPL SPL  | TPL SPL   |
| D) All test mediums | RCS CCS | RCS CCS    | RCS CCS    | RCS CCS    | RCS CCS    | RCS CCS    | RCS CCS    | RCS CCS    | RCS CCS    | RCS CCS     | RCS CCS  | RCS CCS   |
|                     | TPL SPL | TPL SPL    | TPL SPL    | TPL SPL    | TPL SPL    | TPL SPL    | TPL SPL    | TPL SPL    | TPL SPL    | TPL SPL     | TPL SPL  | TPL SPL   |

N/A: not enough data for calculation were available, therefore the corresponding EF could not be calculated.

Figure S11. Effect factors (PAF.m<sup>3</sup>/kg) for nAg coated with other capping agents based on size and test media

**COATING: All coatings (i.e. regardless of coating)**

|                     | 1-10 nm | 10.1-20 nm | 20.1-30 nm | 30.1-40 nm | 40.1-50 nm | 50.1-60 nm | 60.1-70 nm | 70.1-80 nm | 80.1-90 nm | 90.1-100 nm | > 100 nm | All sizes |
|---------------------|---------|------------|------------|------------|------------|------------|------------|------------|------------|-------------|----------|-----------|
| A) Water            | RCS CCS | RCS CCS    | RCS CCS    | RCS CCS    | RCS CCS    | RCS CCS    | RCS CCS    | RCS CCS    | RCS CCS    | RCS CCS     | RCS CCS  | RCS CCS   |
|                     | TPL SPL | TPL SPL    | TPL SPL    | TPL SPL    | TPL SPL    | TPL SPL    | TPL SPL    | TPL SPL    | TPL SPL    | TPL SPL     | TPL SPL  | TPL SPL   |
| B) Mineral Medium   | RCS CCS | RCS CCS    | RCS CCS    | RCS CCS    | RCS CCS    | RCS CCS    | RCS CCS    | RCS CCS    | RCS CCS    | RCS CCS     | RCS CCS  | RCS CCS   |
|                     | TPL SPL | TPL SPL    | TPL SPL    | TPL SPL    | TPL SPL    | TPL SPL    | TPL SPL    | TPL SPL    | TPL SPL    | TPL SPL     | TPL SPL  | TPL SPL   |
| C) Complex Medium   | RCS CCS | RCS CCS    | RCS CCS    | RCS CCS    | RCS CCS    | RCS CCS    | RCS CCS    | RCS CCS    | RCS CCS    | RCS CCS     | RCS CCS  | RCS CCS   |
|                     | TPL SPL | TPL SPL    | TPL SPL    | TPL SPL    | TPL SPL    | TPL SPL    | TPL SPL    | TPL SPL    | TPL SPL    | TPL SPL     | TPL SPL  | TPL SPL   |
| D) All test mediums | RCS CCS | RCS CCS    | RCS CCS    | RCS CCS    | RCS CCS    | RCS CCS    | RCS CCS    | RCS CCS    | RCS CCS    | RCS CCS     | RCS CCS  | RCS CCS   |
|                     | TPL SPL | TPL SPL    | TPL SPL    | TPL SPL    | TPL SPL    | TPL SPL    | TPL SPL    | TPL SPL    | TPL SPL    | TPL SPL     | TPL SPL  | TPL SPL   |

N/A: not enough data for calculation were available, therefore the corresponding EF could not be calculated.

Figure S12. Effect factors (PAF.m<sup>3</sup>/kg) for nAg based on size and test media regardless of coating

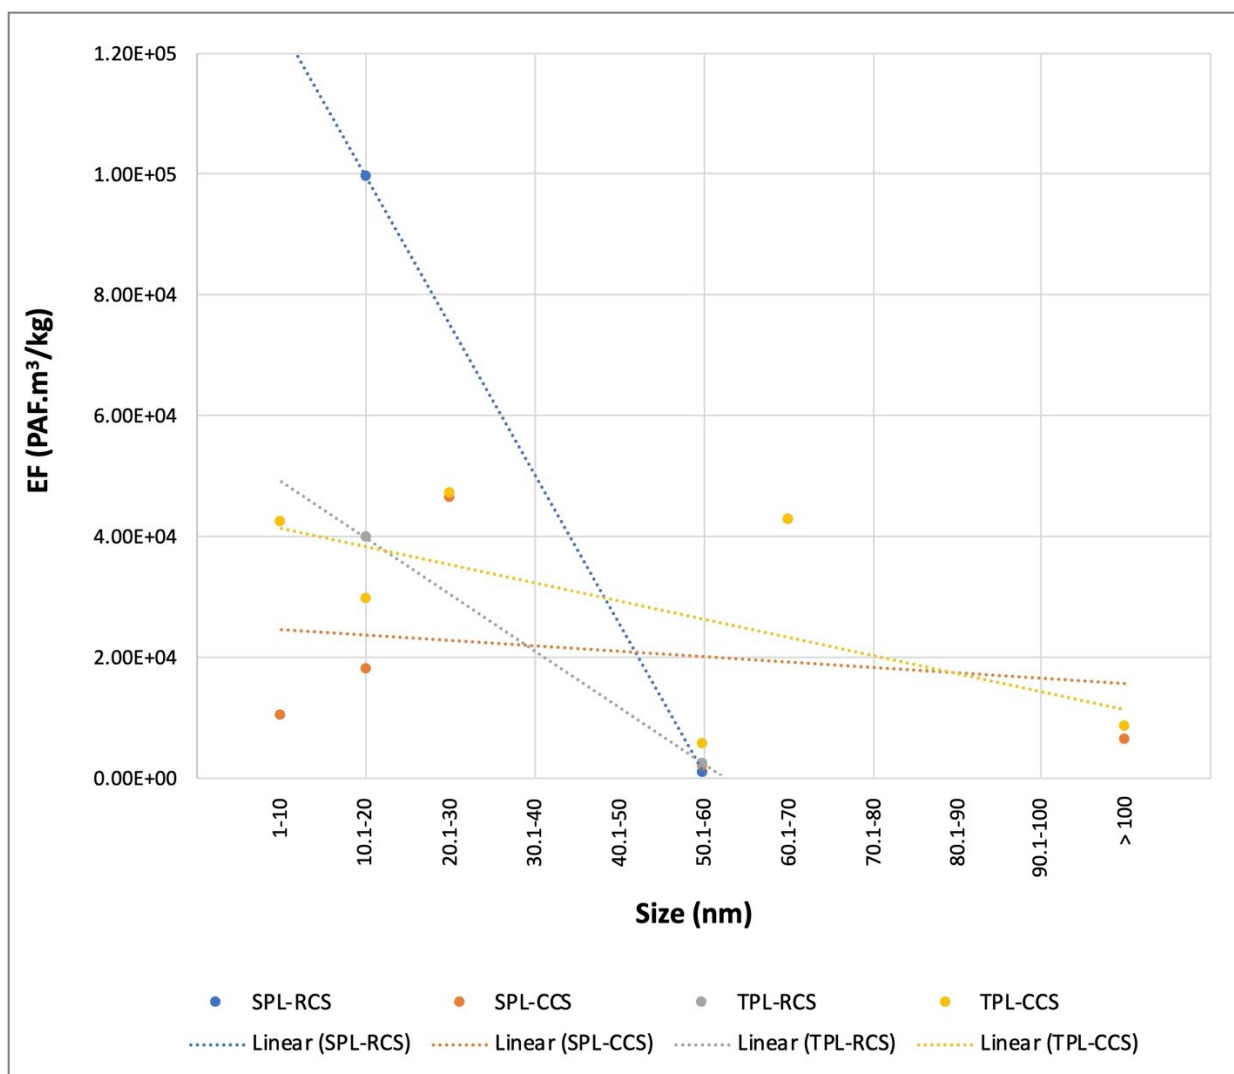

Figure S13. Size dependent effect factors for different scenarios and respective trendlines
