# Supplementary material for: Emerging investigator series: calculating size- and coating-dependent effect factors for silver nanoparticles to inform characterization factor development for usage in life cycle assessment
Source: Royal Society of Chemistry journal article supplement (doi:10.1039/d0en00675k), 2020-01-01
Supplement: d0en00675k2.xlsx [file d0en00675k2.xlsx]

## Sheet: Crustaceans
General Environment & Taxa	Species	Endpoint	Exposure Time (h: hour(s), d: day(s))	Acute/Chronic (Based on USEtox)	Reported LC50/EC50/IC50	LC50/EC50/IC50 (kg Ag/m3)	Average Size (nm)	Coating	Method	Test Medium	LC50/EC50/IC50 for Ag(+) (kg Ag/m3) (regardless of size)	Reference	DOI
FW Crustacean	Daphnia magna	mortality	48 h	A	LC50	1.1e-06	5.94	citrate	US EPA 600/4-90/027F	mineral (MHRW)	1.1e-06	Allen et al. 2010	10.1002/etc.329
FW Crustacean	Daphnia magna	mortality	48 h	A	LC50	3.15e-05	39.4	coated (proprietary)	US EPA 600/4-90/027F	mineral (MHRW)	1.1e-06	Allen et al. 2010	10.1002/etc.329
FW Crustacean	Daphnia magna	mortality	48 h	A	LC50	1.67e-05	681.4	uncoated	US EPA 600/4-90/027F	mineral (MHRW)	1.1e-06	Allen et al. 2010	10.1002/etc.329
FW Crustacean	Daphnia magna	mortality	48 h	A	LC50	1e-06	773.6	coffee	US EPA 600/4-90/027F	mineral (MHRW)	1.1e-06	Allen et al. 2010	10.1002/etc.329
FW Crustacean	Daphnia magna	mortality	48 h	A	LC50	4.4e-06	39.4	coated (proprietary)	US EPA 600/4-90/027F	mineral (MHRW)	7e-07	Allen et al. 2010	10.1002/etc.329
FW Crustacean	Daphnia magna	mortality	48 h	A	LC50	1.4e-06	681.4	uncoated	US EPA 600/4-90/027F	mineral (MHRW)	7e-07	Allen et al. 2010	10.1002/etc.329
FW Crustacean	Daphnia magna	immobilization	48 h	A	EC50	2e-06	6.47	uncoated	OECD 202	mineral (M4)	2.3e-06	Asghari et al. 2012	10.1186/1477-3155-10-14
FW Crustacean	Daphnia magna	immobilization	48 h	A	EC50	4e-06	7.32	citrate	OECD 202	mineral (M4)	2.3e-06	Asghari et al. 2012	10.1186/1477-3155-10-14
FW Crustacean	Daphnia magna	immobilization	48 h	A	EC50	0.000187	17.97	uncoated	OECD 202	mineral (M4)	2.3e-06	Asghari et al. 2012	10.1186/1477-3155-10-14
FW Crustacean	Ceriodaphnia cornuta	mortality	24 h	A	LC50	0.0386	9.4	Camellia sinensis	N/A	mineral (OECD)	0.0192	Banumathi et al. 2017	10.1007/s10876-017-1201-5
FW Crustacean	Daphnia magna	immobilization	48 h	A	EC50	5.4e-05	8.4	PVP	OECD 202	mineral (AFW)	2.2e-06	Blinova et al. 2013	10.1007/s11356-012-1290-5
FW Crustacean	Thamnocephalus platyurus	mortality	24 h	A	LC50	6.88e-05	8.4	PVP	OECD 202	mineral (AFW)	5.7e-06	Blinova et al. 2013	10.1007/s11356-012-1290-5
FW Crustacean	Daphnia magna	immobilization	48 h	A	EC50	0.000137	8.4	PVP	OECD 202	complex (river)	1.40414e-05	Blinova et al. 2013	10.1007/s11356-012-1290-5
FW Crustacean	Thamnocephalus platyurus	mortality	24 h	A	LC50	0.000191	8.4	PVP	OECD 202	complex (river)	1.07e-05	Blinova et al. 2013	10.1007/s11356-012-1290-5
FW Crustacean	Daphnia magna	immobilization	48 h	A	EC50	0.00018887	8.4	PVP	OECD 202	complex (lake)	8.9962e-06	Blinova et al. 2013	10.1007/s11356-012-1290-5
FW Crustacean	Thamnocephalus platyurus	mortality	24 h	A	LC50	0.00039	8.4	PVP	OECD 202	complex (lake)	1.68e-05	Blinova et al. 2013	10.1007/s11356-012-1290-5
FW Crustacean	Daphnia magna	reproduction/mortality	21 d	C	-	5.8e-05	8.4	PVP	OECD 211	complex (river)	N/A	Blinova et al. 2013	10.1007/s11356-012-1290-5
FW Crustacean	Daphnia magna	immobilization	48 h	A	EC50	4.94e-05	12.5	protein	OECD 202	mineral (AFW)	2.2e-06	Blinova et al. 2013	10.1007/s11356-012-1290-5
FW Crustacean	Thamnocephalus platyurus	mortality	24 h	A	LC50	0.000256	12.5	protein	OECD 202	mineral (AFW)	5.7e-06	Blinova et al. 2013	10.1007/s11356-012-1290-5
FW Crustacean	Daphnia magna	immobilization	48 h	A	EC50	4.88659e-05	12.5	protein	OECD 202	complex (river)	1.40414e-05	Blinova et al. 2013	10.1007/s11356-012-1290-5
FW Crustacean	Thamnocephalus platyurus	mortality	24 h	A	LC50	0.000162	12.5	protein	OECD 202	complex (river)	1.07e-05	Blinova et al. 2013	10.1007/s11356-012-1290-5
FW Crustacean	Daphnia magna	immobilization	48 h	A	EC50	6.29946e-05	12.5	protein	OECD 202	complex (lake)	8.9962e-06	Blinova et al. 2013	10.1007/s11356-012-1290-5
FW Crustacean	Thamnocephalus platyurus	mortality	24 h	A	LC50	0.00025	12.5	protein	OECD 202	complex (lake)	1.68e-05	Blinova et al. 2013	10.1007/s11356-012-1290-5
FW Crustacean	Daphnia magna	reproduction/mortality	21 d	C	-	3.7e-05	12.5	protein	OECD 211	complex (river)	N/A	Blinova et al. 2013	10.1007/s11356-012-1290-5
FW Crustacean	Daphnia magna	reproduction/mortality	21 d	C	-	7.4e-05	12.5	protein	OECD 211	complex (lake)	N/A	Blinova et al. 2013	10.1007/s11356-012-1290-5
FW Crustacean	Moina macrocopa	mortality	48 h	A	LC50	0.00011	20.8	PVP	OECD 202	mineral (MHRW)	N/A	Borase et al. 2019	10.1016/j.chemosphere.2018.12.031
FW Crustacean	Moina macrocopa	mortality	48 h	A	LC50	0.00116	40.04	L Tyrosine	OECD 202	mineral (MHRW)	N/A	Borase et al. 2019	10.1016/j.chemosphere.2018.12.031
FW Crustacean	Daphnia magna	growth and survival	48 h	A	LC50	1.7e-05	10	CPA	US EPA 821/R-02/012	mineral (COMBO)	N/A	Conine and Frost 2017	10.1007/s10646-016-1747-2
FW Crustacean	Daphnia magna	mortality	48 h	A	LC50	2.75e-06	1–10	CPA	OECD 202	mineral (COMBO)	N/A	Das et al. 2013	10.1007/s00128-013-1015-6
FW Crustacean	Daphnia magna	growth and mortality	96 h	A	LC50	0.0001	35	uncoated	US EPA 821/R-02/012	mineral (MHRW)	N/A	Gaiser et al. 2011	10.1039/C1EM10060B
FW Crustacean	Daphnia magna	moulting	21 d	C	LC50	1e-06	35	uncoated	US EPA 821/R-02/012	mineral (MHRW)	N/A	Gaiser et al. 2011	10.1039/C1EM10060B
FW Crustacean	Daphnia magna	moulting	21 d	C	LC50	5e-06	35	uncoated	US EPA 821/R-02/012	mineral (MHRW)	N/A	Gaiser et al. 2011	10.1039/C1EM10060B
M Crustacean	Artemia salina	mortality	24 h	A	LC50	0.00996	1-10	N/A		mineral (FNSW)	N/A	Gambardella et al. 2015	10.1016/j.marenvres.2015.06.001
M Crustacean	Amphibaanus amphitrite	mortality	24 h	A	LC50	0.00055	1-10	N/A		mineral (FNSW)	N/A	Gambardella et al. 2015	10.1016/j.marenvres.2015.06.001
M Crustacean	Artemia salina	mortality	48 h	A	LC50	0.00379	1-10	N/A		mineral (FNSW)	N/A	Gambardella et al. 2015	10.1016/j.marenvres.2015.06.001
M Crustacean	Amphibaanus amphitrite	mortality	48 h	A	LC50	0.00027	1-10	N/A		mineral (FNSW)	N/A	Gambardella et al. 2015	10.1016/j.marenvres.2015.06.001
FW Crustacean	Ceriodaphnia dubia	mortality and/or immobilization	48 h	A	LC50	4.6e-07	20-30	N/A	US EPA 3050B	complex (Suwannee River)	N/A	Gao et al. 2009	10.1021/es803315v
FW Crustacean	Ceriodaphnia dubia	mortality and/or immobilization	48 h	A	LC50	6.18e-06	20-30	N/A	US EPA 3050B	complex (Suwannee River)	N/A	Gao et al. 2009	10.1021/es803315v
FW Crustacean	Ceriodaphnia dubia	mortality and/or immobilization	48 h	A	LC50	7.71e-07	20-30	N/A	US EPA 3050B	complex (Suwannee River)	N/A	Gao et al. 2009	10.1021/es803315v
FW Crustacean	Ceriodaphnia dubia	mortality and/or immobilization	48 h	A	LC50	6.96e-07	20-30	N/A	US EPA 3050B	complex (Suwannee River)	N/A	Gao et al. 2009	10.1021/es803315v
FW Crustacean	Daphnia magna	immobilization	48 h	A	EC50	0.00012	20	N/A	OECD 202	mineral (OECD)	1.4e-06	Georgantzopoulou et al. 2013	10.3109/17435390.2012.715312
FW Crustacean	Daphnia magna	immobilization	48 h	A	EC50	1.2e-06	23	N/A	OECD 202	mineral (OECD)	1.4e-06	Georgantzopoulou et al. 2013	10.3109/17435390.2012.715312
FW Crustacean	Daphnia magna	immobilization	48 h	A	EC50	2e-05	27	N/A	OECD 202	mineral (OECD)	1.4e-06	Georgantzopoulou et al. 2013	10.3109/17435390.2012.715312
FW Crustacean	Daphnia magna	immobilization	48 h	A	EC50	0.00065	200	N/A	OECD 202	mineral (OECD)	1.4e-06	Georgantzopoulou et al. 2013	10.3109/17435390.2012.715312
FW Crustacean	Ceriodaphnia dubia	mortality and/or immobilization	48 h	A	LC50	6.7e-05	26.6	metal oxide	US EPA 821/R-02/013	mineral (MHFW)	0.00016	Griffitt et al. 2008	10.1897/08-002.1
FW Crustacean	Daphnia pulex	mortality and/or immobilization	48 h	A	LC50	4e-05	26.6	metal oxide	US EPA 821/R-02/013	mineral (MHFW)	8e-06	Griffitt et al. 2008	10.1897/08-002.1
FW Crustacean	Daphnia magna	mortality	7 d	SC	LC50	8.5e-06	20	citrate	US EPA 812/R‐02/012	mineral (VSRW)	N/A	Harmon et al. 2014	10.1002/etc.2616
FW Crustacean	Daphnia magna	mortality	7 d	SC	LC50	9.089e-06	20	citrate	US EPA 812/R‐02/012	mineral (SRW)	N/A	Harmon et al. 2014	10.1002/etc.2616
FW Crustacean	Daphnia magna	mortality	7 d	SC	LC50	7.03e-06	54	citrate	US EPA 812/R‐02/012	mineral (VSRW)	N/A	Harmon et al. 2014	10.1002/etc.2616
FW Crustacean	Daphnia magna	mortality	7 d	SC	LC50	5.975e-06	54	citrate	US EPA 812/R‐02/012	mineral (SRW)	N/A	Harmon et al. 2014	10.1002/etc.2616
FW Crustacean	Daphnia magna	mortality	7 d	SC	LC50	6.999e-06	76	citrate	US EPA 812/R‐02/012	mineral (VSRW)	N/A	Harmon et al. 2014	10.1002/etc.2616
FW Crustacean	Daphnia magna	mortality	7 d	SC	LC50	1.0797e-05	76	citrate	US EPA 812/R‐02/012	mineral (SRW)	N/A	Harmon et al. 2014	10.1002/etc.2616
FW Crustacean	Daphnia magna	immobilization	48 h	A	EC50	1.94e-06	21	PVP	OECD 202	complex (lake)	9.3e-07	Heinlaan et al. 2016	10.1016/j.envpol.2016.06.033
FW Crustacean	Daphnia magna	mortality	48 h	A	LC50	7e-06	10	uncoated	US EPA 600/4-90/027F	mineral (Lake Superior)	5.7e-07	Hoheisel et al. 2012	10.1002/etc.1978
FW Crustacean	Daphnia magna	mortality	48 h	A	LC50	1.1e-05	20	uncoated	US EPA 600/4-90/027F	mineral (Lake Superior)	5.7e-07	Hoheisel et al. 2012	10.1002/etc.1978
FW Crustacean	Daphnia magna	mortality	48 h	A	LC50	1.8e-05	30	uncoated	US EPA 600/4-90/027F	mineral (Lake Superior)	5.7e-07	Hoheisel et al. 2012	10.1002/etc.1978
FW Crustacean	Daphnia magna	mortality	48 h	A	LC50	2.74e-05	50	uncoated	US EPA 600/4-90/027F	mineral (Lake Superior)	5.7e-07	Hoheisel et al. 2012	10.1002/etc.1978
FW Crustacean	Daphnia magna	lethality	24 h	A	LC50	2.497e-05	40	PVP	US EPA 812/R‐02/012	water	N/A	Hou et al. 2017	10.1021/acs.est.7b03918
FW Crustacean	Daphnia magna	lethality	24 h	A	LC50	8.9e-06	40	citrate	US EPA 812/R‐02/012	water	N/A	Hou et al. 2017	10.1021/acs.est.7b03918
FW Crustacean	Daphnia magna	lethality	24 h	A	LC50	3.835e-05	110	PVP	US EPA 812/R‐02/012	water	N/A	Hou et al. 2017	10.1021/acs.est.7b03918
FW Crustacean	Daphnia magna	lethality	24 h	A	LC50	1.743e-05	110	citrate	US EPA 812/R‐02/012	water	N/A	Hou et al. 2017	10.1021/acs.est.7b03918
FW Crustacean	Daphnia magna	mortality	21 d	C	EC50	0.00032	8.6	citrate	OECD 211	mineral (M4)	1.2e-06	Hu et al. 2018	10.1016/j.scitotenv.2017.08.222
FW Crustacean	Daphnia magna	immobilization	24 h	A	EC50	0.000105	8.6	citrate	OECD 202	mineral (M4)	2.8e-06	Hu et al. 2018	10.1016/j.scitotenv.2017.08.222
FW Crustacean	Daphnia magna	immobilization	24 h	A	EC50	0.00027	8.6	citrate	OECD 202	complex (lake)	7.5e-06	Hu et al. 2018	10.1016/j.scitotenv.2017.08.222
FW Crustacean	Daphnia magna	immobilization	48 h	A	EC50	0.00011	8.6	citrate	OECD 202	mineral (M4)	1.8e-06	Hu et al. 2018	10.1016/j.scitotenv.2017.08.222
FW Crustacean	Daphnia magna	immobilization	48 h	A	EC50	0.00027	8.6	citrate	OECD 202	complex (lake)	8e-06	Hu et al. 2018	10.1016/j.scitotenv.2017.08.222
FW Crustacean	Daphnia magna	immobilization	48 h	A	EC50	3.7e-05	15	uncoated	OECD 202	mineral (OECD)	N/A	Hund-Rinke et al. 2018	10.1016/j.impact.2017.10.003
FW Crustacean	Daphnia magna	immobilization	48 h	A	EC50	1.6e-06	44	uncoated	OECD 202	mineral (OECD)	N/A	Hund-Rinke et al. 2018	10.1016/j.impact.2017.10.003
FW Crustacean	Daphnia magna	immobilization	48 h	A	EC50	8.5e-06	241	uncoated	OECD 202	mineral (OECD)	N/A	Hund-Rinke et al. 2018	10.1016/j.impact.2017.10.003
FW Crustacean	Daphnia magna	immobilization	48 h	A	EC50	1e-05	10	citrate	OECD 202	mineral (AFW)	2e-06	Ivask et al. 2014	10.1371/journal.pone.0102108
FW Crustacean	Daphnia magna	immobilization	48 h	A	EC50	3.4e-05	20	citrate	OECD 202	mineral (AFW)	2e-06	Ivask et al. 2014	10.1371/journal.pone.0102108
FW Crustacean	Daphnia magna	immobilization	48 h	A	EC50	0.000141	40	citrate	OECD 202	mineral (AFW)	2e-06	Ivask et al. 2014	10.1371/journal.pone.0102108
FW Crustacean	Daphnia magna	immobilization	48 h	A	EC50	0.000168	60	citrate	OECD 202	mineral (AFW)	2e-06	Ivask et al. 2014	10.1371/journal.pone.0102108
FW Crustacean	Daphnia magna	immobilization	48 h	A	EC50	0.000218	80	citrate	OECD 202	mineral (AFW)	2e-06	Ivask et al. 2014	10.1371/journal.pone.0102108
M Crustacean	Artemia franciscana	immobilization	24 h	A	EC50	0.0013	20.4	PVP		mineral (AFW)	N/A	Jemec et al. 2016	10.1016/j.envint.2015.10.014
M Crustacean	Artemia franciscana	immobilization	48 h	A	EC50	0.0108	20.4	PVP		mineral (AFW)	0.015	Jemec et al. 2016	10.1016/j.envint.2015.10.014
FW Crustacean	Daphnia magna	immobilization	48 h	A	EC50	2.5e-06	20.4	PVP	OECD 202	mineral (AFW)	1e-06	Jemec et al. 2016	10.1016/j.envint.2015.10.014
FW Crustacean	Ceriodaphnia cornuta	mortality	1 h	A	LC50	0.0235	8.2	N/A	OECD, US EPA	water (SSF)	0.0147	Jenifer et al. 2019	10.1007/s10876-019-01704-7
FW Crustacean	Daphnia magna	immobilization	24 h	A	EC50	1e-05	<100	N/A	US EPA	mineral (MHRW)	3.2e-06	Jo et al. 2012	10.1016/j.jhazmat.2012.05.066
FW Crustacean	Daphnia magna	mortality	48 h	A	LC50	5.4e-06	10	N/A	US EPA 812/R‐02/012	mineral (MHRW)	1.2e-06	Kennedy et al. 2010	10.1021/es1025382
FW Crustacean	Daphnia magna	mortality	48 h	A	LC50	5.3e-06	20	N/A	US EPA 812/R‐02/012	mineral (MHRW)	1.2e-06	Kennedy et al. 2010	10.1021/es1025382
FW Crustacean	Daphnia magna	mortality	48 h	A	LC50	1.11e-05	29	citrate	US EPA 812/R‐02/012	mineral (MHRW)	1.2e-06	Kennedy et al. 2010	10.1021/es1025382
FW Crustacean	Daphnia magna	mortality	48 h	A	LC50	1.8e-06	31	N/A	US EPA 812/R‐02/012	mineral (MHRW)	1.2e-06	Kennedy et al. 2010	10.1021/es1025382
FW Crustacean	Daphnia magna	mortality	48 h	A	LC50	1.49e-05	36	N/A	US EPA 812/R‐02/012	mineral (MHRW)	1.2e-06	Kennedy et al. 2010	10.1021/es1025382
FW Crustacean	Daphnia magna	mortality	48 h	A	LC50	9.7e-05	41	PVP	US EPA 812/R‐02/012	mineral (MHRW)	1.2e-06	Kennedy et al. 2010	10.1021/es1025382
FW Crustacean	Daphnia magna	mortality	48 h	A	LC50	5.4e-06	50	N/A	US EPA 812/R‐02/012	mineral (MHRW)	1.2e-06	Kennedy et al. 2010	10.1021/es1025382
FW Crustacean	Daphnia magna	mortality	48 h	A	LC50	1.77e-05	80	N/A	US EPA 812/R‐02/012	mineral (MHRW)	1.2e-06	Kennedy et al. 2010	10.1021/es1025382
FW Crustacean	Ceriodaphnia dubia	mortality	48 h	A	LC50	4.8e-06	20	citrate	US EPA 812/R‐02/012	mineral (MHRW)	7e-07	Kennedy et al. 2012	10.1021/es302322y
FW Crustacean	Ceriodaphnia dubia	mortality	48 h	A	LC50	>4.65E-05	20	citrate	US EPA 812/R‐02/012	complex	1.9e-06	Kennedy et al. 2012	10.1021/es302322y
FW Crustacean	Ceriodaphnia dubia	mortality	48 h	A	LC50	2.67e-05	100	citrate	US EPA 812/R‐02/012	mineral (MHRW)	7e-07	Kennedy et al. 2012	10.1021/es302322y
FW Crustacean	Ceriodaphnia dubia	mortality	48 h	A	LC50	>4.14E-05	100	citrate	US EPA 812/R‐02/012	complex	1.9e-06	Kennedy et al. 2012	10.1021/es302322y
FW Crustacean	Daphnia magna	immobilization	48 h	A	EC50	1e-06	60	uncoated	OECD 202	mineral (M4)	5e-07	Kim et al. 2011	10.3109/17435390.2010.508137
FW Crustacean	Daphnia magna	immobilization	48 h	A	EC50	1.4e-06	300	uncoated	OECD 202	mineral (M4)	5e-07	Kim et al. 2011	10.3109/17435390.2010.508137
FW Crustacean	Daphnia magna	immobilization	24 h	A	EC50	4.1e-05	20	uncoated	OECD 202	mineral (OECD)	2.3e-06	Köser et al. 2017	10.1039/c7en00026j
FW Crustacean	Daphnia magna	immobilization	48 h	A	EC50	4.5e-05	56.6	PVP	OECD 202	mineral (MHW)	N/A	Kwak et al. 2016	10.3109/17435390.2015.1090028
M Crustacean	Artemia salina	immobilization	24 h	A	EC50	0.0193	5	PVP/PEI		mineral (ASW)	N/A	Lacave et al. 2017	10.1016/j.cbpc.2017.03.008
M Crustacean	Artemia salina	immobilization	48 h	A	EC50	0.00739	5	PVP/PEI		mineral (ASW)	N/A	Lacave et al. 2017	10.1016/j.cbpc.2017.03.008
FW Crustacean	Daphnia magna	immobilization	48 h	A	EC50	7.98e-06	13.3	citrate	N/A	mineral (M4)	5.7e-07	Lee et al. 2012	10.1002/etc.717
FW Crustacean	Daphnia magna	immobilization	48 h	A	EC50	7.5e-07	60-100	uncoated	N/A	mineral (M4)	5.7e-07	Lee et al. 2012	10.1002/etc.717
FW Crustacean	Daphnia carinata	immobilization	48 h	A	EC50	4.974e-05	10.56	tyrosine	OECD 202	mineral (MHW) ASTM	1.21e-06	Lekamge et al. 2019	10.1371/journal.pone.0214398
FW Crustacean	Daphnia carinata	immobilization	48 h	A	EC50	1.937e-05	9.27	epigallocatechin gallate	OECD 202	mineral (MHW) ASTM	1.21e-06	Lekamge et al. 2019	10.1371/journal.pone.0214398
FW Crustacean	Daphnia carinata	immobilization	48 h	A	EC50	2.137e-05	13.68	curcumin	OECD 202	mineral (MHW) ASTM	1.21e-06	Lekamge et al. 2019	10.1371/journal.pone.0214398
FW Crustacean	Daphnia magna	mortality	48 h	A	LC50	1.2e-05	30	citrate-Au	OECD	water (SSF)	2e-06	Li et al. 2010	10.1007/s00216-010-3915-1
FW Crustacean	Daphnia magna	mortality	48 h	A	LC50	4.5e-06	36	citrate	OECD	water (SSF)	2e-06	Li et al. 2010	10.1007/s00216-010-3915-1
FW Crustacean	Daphnia magna	mortality	48 h	A	LC50	6.5e-06	52	citrate	OECD	water (SSF)	2e-06	Li et al. 2010	10.1007/s00216-010-3915-1
FW Crustacean	Daphnia magna	mortality	48 h	A	LC50	1e-05	66	citrate	OECD	water (SSF)	2e-06	Li et al. 2010	10.1007/s00216-010-3915-1
FW Crustacean	Daphnia magna	mortality	48 h	A	LC50	1.5e-05	72	citrate-Au	OECD	water (SSF)	2e-06	Li et al. 2010	10.1007/s00216-010-3915-1
M Crustacean	Artemia salina	immobilization	48 h	A	EC50	0.02135	8.8	citrate		mineral (ASW)	N/A	Lish et al. 2019	10.1016/j.envpol.2019.113358
M Crustacean	Artemia salina	immobilization	48 h	A	EC50	0.04244	8.8	citrate		mineral (ASW)	N/A	Lish et al. 2019	10.1016/j.envpol.2019.113358
FW Crustacean	Daphnia magna	immobilization	48 h	A	EC50	4.76e-05	30	citrate	OECD 202	mineral (M7)	7.5e-07	Mackevica et al. 2015	10.1016/j.aquatox.2015.01.023
FW Crustacean	Daphnia magna	reproduction	21 d	C	-	2e-05	30	citrate	OECD 211	mineral (M7)	N/A	Mackevica et al. 2015	10.1016/j.aquatox.2015.01.023
FW Crustacean	Ceriodaphnia dubia	mortality	48 h	A	LC50	0.000221	76.8	carbon	US EPA	complex (Prairie Creek Preserve)	N/A	McLaughlin and Bonzongo 2012	10.1002/etc.720
FW Crustacean	Ceriodaphnia dubia	mortality	48 h	A	LC50	4.33e-07	25.4	uncoated	US EPA	complex (Ichetucknee River)	N/A	McLaughlin and Bonzongo 2012	10.1002/etc.720
FW Crustacean	Ceriodaphnia dubia	mortality	48 h	A	LC50	4.82e-07	25.4	uncoated	US EPA	mineral (MHRW)	N/A	McLaughlin and Bonzongo 2012	10.1002/etc.720
FW Crustacean	Daphnia magna	reproduction	21 d	C	-	0.0001066	8.4	PVP	N/A	complex (E7)	1.2e-05	Mertens et al. 2019	10.1002/etc.4463
FW Crustacean	Daphnia magna	immobilization	24 h	A	EC50	0.0002896	8.4	PVP	N/A	complex (E7)	1.39e-05	Mertens et al. 2019	10.1002/etc.4463
FW Crustacean	Daphnia magna	mortality	24 h	A	LC50	1.5e-06	<100	N/A	OECD 211	water	N/A	Park and Choi 2010	10.4491/eer.2010.15.1.428
FW Crustacean	Daphnia lumholtzi	mortality	24 h	A	LC50	6.93e-05	9.8	N/A	OECD 202	mineral (COMBO)	N/A	Pham 2019	10.4194/1303-2712-v19_12_03
FW Crustacean	Daphnia lumholtzi	mortality	48 h	A	LC50	5.76e-05	9.8	N/A	OECD 202	mineral (COMBO)	N/A	Pham 2019	10.4194/1303-2712-v19_12_03
FW Crustacean	Daphnia lumholtzi	survival, growth and reproduction	21 d	C	-	>5.00E-07	9.8	N/A	OECD 202	mineral (COMBO)	N/A	Pham 2019	10.4194/1303-2712-v19_12_03
FW Crustacean	Daphnia magna	mortality	48 h	A	EC50	0.000798	56.5	citrate	US EPA	mineral (MHW)	4.3e-06	Pokhrel et al. 2013	10.1021/es403462j
FW Crustacean	Daphnia magna	mortality	24 h	A	LC50	6.1e-06	35	uncoated	US EPA	mineral (MHRW)	4e-07	Poynton et al. 2012	10.1021/es3001618
FW Crustacean	Daphnia magna	mortality	24 h	A	LC50	1.8e-06	40	citrate	US EPA	mineral (MHRW)	4e-07	Poynton et al. 2012	10.1021/es3001618
FW Crustacean	Daphnia magna	mortality	24 h	A	LC50	1.06e-05	35-50	PVP	US EPA	mineral (MHRW)	4e-07	Poynton et al. 2012	10.1021/es3001618
FW Crustacean	Daphnia magna	immobilization	48 h	A	EC50	4.72e-05	3-11.4	citrate	OECD	mineral	4.5e-06	Rainville et al. 2014	10.1039/c3an02160b
FW Crustacean	Daphnia magna	mortality	24 h	A	LC50	0.26495	17	protein	US EPA 821/R-02/012	water (SSF)	N/A	Rani et al. 2011	10.1016/j.colsurfa.2011.08.028
FW Crustacean	Daphnia magna	mortality	48 h	A	LC50	0.11793	17	protein	US EPA 821/R-02/012	water (SSF)	N/A	Rani et al. 2011	10.1016/j.colsurfa.2011.08.028
FW Crustacean	Daphnia magna	mortality	24 h	A	LC50	0.16179	18	protein	US EPA 821/R-02/012	water (SSF)	N/A	Rani et al. 2011	10.1016/j.colsurfa.2011.08.028
FW Crustacean	Daphnia magna	mortality	48 h	A	LC50	0.08057	18	protein	US EPA 821/R-02/012	water (SSF)	N/A	Rani et al. 2011	10.1016/j.colsurfa.2011.08.028
FW Crustacean	Daphnia magna	mortality	24 h	A	LC50	0.14179	27	protein	US EPA 821/R-02/012	water (SSF)	N/A	Rani et al. 2011	10.1016/j.colsurfa.2011.08.028
FW Crustacean	Daphnia magna	mortality	48 h	A	LC50	0.07528	27	protein	US EPA 821/R-02/012	water (SSF)	N/A	Rani et al. 2011	10.1016/j.colsurfa.2011.08.028
FW Crustacean	Daphnia magna	mortality	24 h	A	LC50	0.13297	28	protein	US EPA 821/R-02/012	water (SSF)	N/A	Rani et al. 2011	10.1016/j.colsurfa.2011.08.028
FW Crustacean	Daphnia magna	mortality	48 h	A	LC50	0.06876	28	protein	US EPA 821/R-02/012	water (SSF)	N/A	Rani et al. 2011	10.1016/j.colsurfa.2011.08.028
FW Crustacean	Daphnia magna	mortality	24 h	A	LC50	0.12742	120	protein	US EPA 821/R-02/012	water (SSF)	N/A	Rani et al. 2011	10.1016/j.colsurfa.2011.08.028
FW Crustacean	Daphnia magna	mortality	48 h	A	LC50	0.06195	120	protein	US EPA 821/R-02/012	water (SSF)	N/A	Rani et al. 2011	10.1016/j.colsurfa.2011.08.028
FW Crustacean	Daphnia magna	mortality	48 h	A	LC50	5e-05	20-40	N/A	N/A	mineral (RHFW)	3.5e-06	Resano et al. 2013	10.1039/C2AY26456K
FW Crustacean	Daphnia magna	feeding inhibition	24 h	A	EC50	1.364e-05	7.5	alkane	N/A	mineral (MHW) ASTM	2.03e-06	Ribeiro et al. 2014	10.1016/j.scitotenv.2013.06.101
FW Crustacean	Daphnia magna	lethality	24 h	A	EC50	1.141e-05	7.5	alkane	N/A	mineral (MHW) ASTM	1.36e-06	Ribeiro et al. 2014	10.1016/j.scitotenv.2013.06.101
FW Crustacean	Daphnia magna	lethality	48 h	A	EC50	1.102e-05	7.5	alkane	N/A	mineral (MHW) ASTM	1.04e-06	Ribeiro et al. 2014	10.1016/j.scitotenv.2013.06.101
FW Crustacean	Daphnia magna	immobilization	24 h	A	EC50	1.02e-05	7.5	alkane	OECD 202	mineral (MHW) ASTM	1.05e-06	Ribeiro et al. 2014	10.1016/j.scitotenv.2013.06.101
FW Crustacean	Daphnia magna	reproduction	21 d	C	EC50	1e-06	7.5	alkane	OECD 211	mineral (MHW) ASTM	3.8e-07	Ribeiro et al. 2014	10.1016/j.scitotenv.2013.06.101
FW Crustacean	Daphnia magna	immobilization	24 h	A	EC50	7.46e-06	7	citrate	OECD 202	mineral (OECD and ISO)	N/A	Römer et al. 2013	10.1016/j.toxlet.2013.08.026
FW Crustacean	Daphnia magna	immobilization	48 h	A	EC50	2.43e-06	79.9	uncoated	OECD 202	mineral (OECD)	2.5e-07	Sakamoto et al. 2015	10.1007/s00244-014-0091-x
FW Crustacean	Daphnia galeata	immobilization	48 h	A	EC50	2.16e-06	79.9	uncoated	OECD 202	mineral (OECD)	1.6e-07	Sakamoto et al. 2015	10.1007/s00244-014-0091-x
FWM Crustacean	Bosmina longirostris	immobilization	48 h	A	EC50	2.9e-06	79.9	uncoated	OECD 202	mineral (OECD)	2.2e-07	Sakamoto et al. 2015	10.1007/s00244-014-0091-x
FW Crustacean	Daphnia magna	mortality	24 h	A	LC50	0.000421	30	PVP	US EPA	mineral (COMBO)	8e-07	Scanlan et al. 2013	10.1021/nn4034103
FW Crustacean	Daphnia magna	mortality	24 h	A	LC50	0.000155	30	SiO2	US EPA	mineral (COMBO)	8e-07	Scanlan et al. 2013	10.1021/nn4034103
FW Crustacean	Daphnia magna	mortality	24 h	A	LC50	0.0002607	30	PVP	US EPA	mineral (MHW)	6e-07	Scanlan et al. 2013	10.1021/nn4034103
FW Crustacean	Daphnia magna	mortality	24 h	A	LC50	3.6e-06	30	SiO2	US EPA	mineral (MHW)	6e-07	Scanlan et al. 2013	10.1021/nn4034103
FW Crustacean	Daphnia magna	mortality	24 h	A	LC50	0.0002339	65	PVP	US EPA	mineral (COMBO)	8e-07	Scanlan et al. 2013	10.1021/nn4034103
FW Crustacean	Daphnia magna	mortality	24 h	A	LC50	0.000522	65	SiO2	US EPA	mineral (COMBO)	8e-07	Scanlan et al. 2013	10.1021/nn4034103
FW Crustacean	Daphnia magna	mortality	24 h	A	LC50	0.0004154	65	PVP	US EPA	mineral (MHW)	6e-07	Scanlan et al. 2013	10.1021/nn4034103
FW Crustacean	Daphnia magna	mortality	24 h	A	LC50	0.0002265	65	SiO2	US EPA	mineral (MHW)	6e-07	Scanlan et al. 2013	10.1021/nn4034103
FW Crustacean	Daphnia magna	immobilization	48 h	A	EC50	4.12e-06	26	citrate	OECD 202	mineral (RHFW)	2.465e-05	Seitz et al. 2015	10.1016/j.ecoenv.2014.09.031
FW Crustacean	Daphnia magna	immobilization	48 h	A	EC50	1.26e-06	26	citrate	OECD 202	complex	2.4e-05	Seitz et al. 2015	10.1016/j.ecoenv.2014.09.031
FW Crustacean	Daphnia magna	mortality	21 d	C	-	5.024e-05	35	citrate	OECD 211	mineral (RHFW)	2.465e-05	Seitz et al. 2015	10.1016/j.ecoenv.2014.09.031
FW Crustacean	Daphnia magna	mortality	21 d	C	-	5.994e-05	35	citrate	OECD 211	complex	2.4e-05	Seitz et al. 2015	10.1016/j.ecoenv.2014.09.031
FW Crustacean	Daphnia magna	immobilization	48 h	A	EC50	7.35e-07	68	citrate	OECD 202	mineral (RHFW)	2.465e-05	Seitz et al. 2015	10.1016/j.ecoenv.2014.09.031
FW Crustacean	Daphnia magna	immobilization	48 h	A	EC50	2.135e-06	106	citrate	OECD 202	mineral (RHFW)	2.465e-05	Seitz et al. 2015	10.1016/j.ecoenv.2014.09.031
FW Crustacean	Daphnia magna	immobilization	48 h	A	EC50	5.74e-06	144	uncoated	OECD 202	mineral (RHFW)	2.465e-05	Seitz et al. 2015	10.1016/j.ecoenv.2014.09.031
FW Crustacean	Daphnia magna	immobilization	48 h	A	EC50	3.39e-06	144	uncoated	OECD 202	complex	2.4e-05	Seitz et al. 2015	10.1016/j.ecoenv.2014.09.031
FW Crustacean	Ceriodaphnia cornuta	immobilization	24 h	A	EC50	5e-05	18.7-63.4	BLCFE	OECD 202	water (SSF)	2.2e-05	Shanthi et al. 2016	10.1016/j.micpath.2016.01.014
FW Crustacean	Daphnia magna	mortality	48 h	A	LC50	4.1e-07	10	BPEI	US EPA/600/8-87/011	mineral (MHW)	N/A	Silva et al. 2014	10.1016/j.scitotenv.2013.09.006
FW Crustacean	Daphnia magna	mortality	48 h	A	LC50	2.88e-06	56	citrate	US EPA/600/8-87/011	mineral (MHW)	N/A	Silva et al. 2014	10.1016/j.scitotenv.2013.09.006
FW Crustacean	Daphnia magna	mortality	48 h	A	LC50	4.79e-06	72	PVP	US EPA/600/8-87/011	mineral (MHW)	N/A	Silva et al. 2014	10.1016/j.scitotenv.2013.09.006
FW Crustacean	Daphnia magna	immobilization	48 h	A	EC50	1.2e-05	5	citrate	OECD 202	mineral (M4)	N/A	Sohn et al. 2015	10.1155/2015/893049
FW Crustacean	Daphnia magna	immobilization and mortality	24 h	A	EC50	1.38e-05	18.2	citrate	OECD	water	5.4e-06	Ulm et al. 2015	10.1007/s11356-015-5201-4
FW Crustacean	Daphnia magna	immobilization and mortality	48 h	A	EC50	1.24e-05	18.2	citrate	OECD	water	2.6e-06	Ulm et al. 2015	10.1007/s11356-015-5201-4
FW Crustacean	Ceriodaphnia cornuta	mortality	24 h	A	LC50	7.94e-06	23	SA	US EPA 821/R-02/012	water (SSF)	3.2e-06	Vijayakumar et al. 2016	10.1016/j.jece.2016.03.036
FW Crustacean	Daphnia magna	immobilization	48 h	A	EC50	4.1e-05	15	coated (proprietary)	OECD 202	mineral (OECD)	N/A	Voelker et al. 2015	10.1016/j.envres.2015.05.011
FW Crustacean	Daphnia magna	immobilization	4 d	A	EC50	3.1e-05	15	coated (proprietary)	OECD 202	mineral (OECD)	N/A	Voelker et al. 2015	10.1016/j.envres.2015.05.011
FW Crustacean	Daphnia magna	immobilization	48 h	A	EC50	0.000121	15	PVP	OECD 202	mineral (M4)	1.1e-06	Völker et al. 2013	10.1371/journal.pone.0075026
FW Crustacean	Daphnia magna	mortality	21 d	C	-	9.2e-07	15	PVP	OECD 211	mineral (M4)	N/A	Völker et al. 2013	10.1371/journal.pone.0075026
FW Crustacean	Daphnia pulex	immobilization	48 h	A	EC50	8.95e-06	15	PVP	OECD 202	mineral (M4)	6.8e-07	Völker et al. 2013	10.1371/journal.pone.0075026
FW Crustacean	Daphnia pulex	mortality	21 d	C	-	2.25e-06	15	PVP	OECD 211	mineral (M4)	N/A	Völker et al. 2013	10.1371/journal.pone.0075026
FW Crustacean	Daphnia galeata	immobilization	48 h	A	EC50	1.39e-05	15	PVP	OECD 202	mineral (M4)	2.13e-06	Völker et al. 2013	10.1371/journal.pone.0075026
FW Crustacean	Daphnia galeata	mortality	21 d	C	-	3.45e-06	15	PVP	OECD 211	mineral (M4)	N/A	Völker et al. 2013	10.1371/journal.pone.0075026
FWM Crustacean	Chydorus sphaericus	immobilization	48 h	A	EC50	3.02036e-05	35	uncoated	OECD 202	mineral (OECD)	4.3148e-06	Wang et al. 2012	10.1002/etc.1964
FWM Crustacean	Chydorus sphaericus	immobilization	48 h	A	EC50	8.6296e-06	15	coated (proprietary)	OECD 202	mineral (OECD)	4.3148e-06	Wang et al. 2012	10.1002/etc.1964
FWM Crustacean	Chydorus sphaericus	immobilization	48 h	A	EC50	1.29444e-05	80	PVP	OECD 202	mineral (OECD)	4.3148e-06	Wang et al. 2012	10.1002/etc.1964
FWM Crustacean	Chydorus sphaericus	immobilization	48 h	A	EC50	0.000798164	200	PVP	OECD 202	complex	9.7074e-06	Wang et al. 2015	10.1002/etc.2936
FW Crustacean	Daphnia similis	survival	21 d	C	-	2e-08	20	PVP	OECD 211	water	N/A	Wang et al. 2018	10.1016/j.ecoenv.2018.07.080
FW Crustacean	Daphnia similis	mortality	48 h	A	LC50	1.59e-06	20	PVP	OECD 211	water	N/A	Wang et al. 2018	10.1016/j.ecoenv.2018.07.080
FW Crustacean	Daphnia magna	mortality	48 h	A	LC50	0.00022	70	PEG, Si, Ami-Si	N/A	mineral	N/A	Wu et al. 2017	10.1039/C6EN00324A
FW Crustacean	Daphnia similis	baseline metabolite change	48 h	A	LC50	1.59e-06	20	N/A	OECD	mineral (RHFW)	N/A	Zhang et al. 2017	10.1016/j.watres.2017.02.046
FW Crustacean	Daphnia similis	baseline metabolite change	21 d	C	-	2e-08	20	N/A	OECD	mineral (RHFW)	N/A	Zhang et al. 2017	10.1016/j.watres.2017.02.046
FW Crustacean	Daphnia magna	mortality	48 h	A	LC50	>5.00E-04	20	carbonate	OECD 202	water (SSF)	2.51e-06	Zhao and Wang 2011	10.1002/etc.451
FW Crustacean	Daphnia magna	reproduction	21 d	C	-	5e-05	20	carbonate	OECD 211	water (SSF)	1.6e-06	Zhao and Wang 2011	10.1002/etc.451
FW Crustacean	Daphnia magna	mortality	48 h	A	LC50	2.87e-05	<100	lactate	OECD 202	mineral	8.8e-07	Zhao and Wang 2012	10.3109/17435390.2011.579632
FW Crustacean	Daphnia magna	mortality	48 h	A	LC50	2e-06	10-20	PVP	OECD 202	mineral	8.8e-07	Zhao and Wang 2012	10.3109/17435390.2011.579632
FW Crustacean	Daphnia magna	mortality	48 h	A	LC50	1.1e-06	10-20	SDBS	OECD 202	mineral	8.8e-07	Zhao and Wang 2012	10.3109/17435390.2011.579632

## Sheet: Algae
General Environment & Taxa	Species	Endpoint	Exposure Time (h: hour(s), d: day(s))	Acute/Chronic (Based on USEtox)	LC50/EC50/IC50	LC50/EC50/IC50 (kg Ag/m3)	Average Size (nm)	Coating	Method	Test Medium	LC50/EC50/IC50 for Ag(+) (kg Ag/m3) (regardless of size)	Reference	DOI
FW Algae	Pseudokirchneriella subcapitata (=Raphidocelis subcapitata)	growth inhibition	72 h	C	IC50	3.67e-05	4.2	PVP	US EPA 600-4-91-002	complex	1.1e-06	Angel et al. 2013	10.1016/j.chemosphere.2013.04.096
FW Algae	Pseudokirchneriella subcapitata (=Raphidocelis subcapitata)	growth inhibition	72 h	C	IC50	1.95e-05	5.9	PVP	US EPA 600-4-91-002	water (SSF)	1.1e-06	Angel et al. 2013	10.1016/j.chemosphere.2013.04.096
FW Algae	Pseudokirchneriella subcapitata (=Raphidocelis subcapitata)	growth inhibition	72 h	C	IC50	3e-06	13.4	citrate	US EPA 600-4-91-002	mineral (SSF)	1.1e-06	Angel et al. 2013	10.1016/j.chemosphere.2013.04.096
FW Algae	Pseudokirchneriella subcapitata (=Raphidocelis subcapitata)	growth inhibition	72 h	C	IC50	5.2e-06	14.7	citrate	US EPA 600-4-91-002	complex	1.1e-06	Angel et al. 2013	10.1016/j.chemosphere.2013.04.096
M Algae	Thalassiosira pseudonana	growth inhibition	72 h	C	EC50	0.0010786	21.6	maltose		mineral (ASW)	0.000129432	Burchardt et al. 2012	10.1021/es300989e
M Algae	Prorocentrum minimum	growth inhibition	72 h	C	EC50	6.71e-05	15	PVP		mineral (L1-Si enriched seawater)	3.03e-05	Butz et al. 2019	10.1016/j.impact.2019.100181
M Algae	Prorocentrum minimum	growth inhibition	72 h	C	EC50	6.05e-05	15	citrate		mineral (L1-Si enriched seawater)	3.03e-05	Butz et al. 2019	10.1016/j.impact.2019.100181
FW Algae	Microcystis aeruginosa	growth inhibition	10 d	C	EC50	7.5e-06	10-18	citrate	N/A	mineral (synthetic culture medium)	N/A	Duong et al. 2016	10.1088/2043-6262/7/3/035018
M Algae	Dunaliella tertiolecta	growth inhibition	72 h	C	IC50	0.0009	1-10	N/A		mineral (FNSW)	N/A	Gambardella et al. 2015	10.1016/j.marenvres.2015.06.001
M Algae	Skeletonema costatum	growth inhibition	72 h	C	IC50	0.0031	1-10	N/A		mineral (FNSW)	N/A	Gambardella et al. 2015	10.1016/j.marenvres.2015.06.001
FW Algae	Desmodesmus subspicatus	growth inhibition	72 h	C	EC50	0.0022	20	N/A	ISO 8692	mineral (ISO)	4.2e-05	Georgantzopoulou et al. 2013	10.3109/17435390.2012.715312
FW Algae	Desmodesmus subspicatus	growth inhibition	72 h	C	EC50	3.4e-05	23	N/A	ISO 8692	mineral (ISO)	4.2e-05	Georgantzopoulou et al. 2013	10.3109/17435390.2012.715312
FW Algae	Desmodesmus subspicatus	growth inhibition	72 h	C	EC50	0.00033	27	N/A	ISO 8692	mineral (ISO)	4.2e-05	Georgantzopoulou et al. 2013	10.3109/17435390.2012.715312
FW Algae	Desmodesmus subspicatus	growth inhibition	72 h	C	EC50	0.0037	200	N/A	ISO 8692	mineral (ISO)	4.2e-05	Georgantzopoulou et al. 2013	10.3109/17435390.2012.715312
M Algae	Dunaliella Salina	mortality	96 h	C	LC50	0.0075	20	uncoated		mineral (Ben-Amotz’s medium)	0.005	Golubev et al. 2016	10.1093/toxsci/kfw023
M Algae	Dunaliella Salina	mortality	96 h	C	LC50	0.12	20	protein		mineral (Ben-Amotz’s medium)	0.005	Golubev et al. 2016	10.1093/toxsci/kfw023
FW Algae	Uronema confervicolum	growth inhibition	48 h	A	EC50	0.0005	20	citrate	N/A	mineral (COMBO)	4.2e-06	Gonzalez et al. 2016	10.1007/s11356-016-7259-z
FW Algae	Uronema confervicolum	growth inhibition	5 d	C	EC50	0.001	20	citrate	N/A	mineral (COMBO)	3.36e-05	Gonzalez et al. 2016	10.1007/s11356-016-7259-z
FW Algae	Uronema confervicolum	growth inhibition	14 d	C	EC50	0.001	20	citrate	N/A	mineral (COMBO)	0.000394	Gonzalez et al. 2016	10.1007/s11356-016-7259-z
FW Algae	Pseudokirchneriella subcapitata (=Raphidocelis subcapitata)	growth inhibition	96 h	C	-	0.00019	26.6	metal oxide	US EPA 821/R-02/013	mineral (MHFW)	N/A	Griffitt et al. 2008	10.1897/08-002.1
FW Algae	Microcystis aeruginosa	growth inhibition	72 h	C	EC50	0.000656	6.24	HA	N/A	mineral (OECD)	N/A	Huang et al. 2016	10.1016/j.colsurfa.2016.09.009
M Algae	Skeletonema costatum	growth inhibition	24 h	A	EC50	0.02577	10	oleylamine		mineral (seawater)	0.000156	Huang et al. 2016	10.1002/jat.3325
FW Algae	Pseudokirchneriella subcapitata (=Raphidocelis subcapitata)	growth inhibition	72 h	C	EC50	4.8e-05	15	uncoated	OECD 201	mineral (OECD)	N/A	Hund-Rinke et al. 2018	10.1016/j.impact.2017.10.003
FW Algae	Pseudokirchneriella subcapitata (=Raphidocelis subcapitata)	growth inhibition	72 h	C	EC50	2.17e-05	44	uncoated	OECD 201	mineral (OECD)	N/A	Hund-Rinke et al. 2018	10.1016/j.impact.2017.10.003
FW Algae	Pseudokirchneriella subcapitata (=Raphidocelis subcapitata)	growth inhibition	72 h	C	EC50	0.00237	241	uncoated	OECD 201	mineral (OECD)	N/A	Hund-Rinke et al. 2018	10.1016/j.impact.2017.10.003
FW Algae	Pseudokirchneriella subcapitata (=Raphidocelis subcapitata)	growth inhibition	72 h	C	EC50	0.00018	10	citrate	OECD 201	mineral (synthetic culture medium)	7e-06	Ivask et al. 2014	10.1371/journal.pone.0102108
FW Algae	Pseudokirchneriella subcapitata (=Raphidocelis subcapitata)	growth inhibition	72 h	C	EC50	0.00052	20	citrate	OECD 201	mineral (synthetic culture medium)	7e-06	Ivask et al. 2014	10.1371/journal.pone.0102108
FW Algae	Pseudokirchneriella subcapitata (=Raphidocelis subcapitata)	growth inhibition	72 h	C	EC50	0.00082	40	citrate	OECD 201	mineral (synthetic culture medium)	7e-06	Ivask et al. 2014	10.1371/journal.pone.0102108
FW Algae	Pseudokirchneriella subcapitata (=Raphidocelis subcapitata)	growth inhibition	72 h	C	EC50	0.00094	60	citrate	OECD 201	mineral (synthetic culture medium)	7e-06	Ivask et al. 2014	10.1371/journal.pone.0102108
FW Algae	Pseudokirchneriella subcapitata (=Raphidocelis subcapitata)	growth inhibition	72 h	C	EC50	0.00114	80	citrate	OECD 201	mineral (synthetic culture medium)	7e-06	Ivask et al. 2014	10.1371/journal.pone.0102108
FW Algae	Pseudokirchneriella subcapitata (=Raphidocelis subcapitata)	growth inhibition	72 h	C	EC50	8.6e-06	20.4	PVP	OECD 201	mineral	7.1e-06	Jemec et al. 2016	10.1016/j.envint.2015.10.014
M Algae	Dunaliella salina	growth inhibition	72 h	C	IC50	0.00154	12.65	citrate		mineral (OECD)	0.000949	Johari et al. 2018	10.1016/j.chemosphere.2018.06.098
FW Algae	Pseudokirchneriella subcapitata (=Raphidocelis subcapitata)	growth inhibition	24 h	A	EC50	5.77e-06	11	N/A	OECD 201	mineral (OECD)	4.19e-06	Kleiven et al. 2019	10.1016/j.chemosphere.2019.01.055
FW Algae	Pseudokirchneriella subcapitata (=Raphidocelis subcapitata)	growth inhibition	48 h	A	EC50	9.67e-06	11	N/A	OECD 201	mineral (OECD)	3.36e-06	Kleiven et al. 2019	10.1016/j.chemosphere.2019.01.055
FW Algae	Pseudokirchneriella subcapitata (=Raphidocelis subcapitata)	growth inhibition	72 h	C	EC50	9.74e-06	11	N/A	OECD 201	mineral (OECD)	7.09e-06	Kleiven et al. 2019	10.1016/j.chemosphere.2019.01.055
FW Algae	Pseudokirchneriella subcapitata (=Raphidocelis subcapitata)	growth inhibition	24 h	A	EC50	1.283e-05	16	N/A	OECD 201	mineral (OECD)	4.19e-06	Kleiven et al. 2019	10.1016/j.chemosphere.2019.01.055
FW Algae	Pseudokirchneriella subcapitata (=Raphidocelis subcapitata)	growth inhibition	48 h	A	EC50	2.951e-05	16	N/A	OECD 201	mineral (OECD)	3.36e-06	Kleiven et al. 2019	10.1016/j.chemosphere.2019.01.055
FW Algae	Pseudokirchneriella subcapitata (=Raphidocelis subcapitata)	growth inhibition	72 h	C	EC50	2.418e-05	16	N/A	OECD 201	mineral (OECD)	7.09e-06	Kleiven et al. 2019	10.1016/j.chemosphere.2019.01.055
FW Algae	Pseudokirchneriella subcapitata (=Raphidocelis subcapitata)	growth inhibition	72 h	C	EC50	0.000617	20	uncoated	OECD 201	mineral	1.61e-05	Köser et al. 2017	10.1039/c7en00026j
FW Algae	Scenedesmus vacuolatus	growth inhibition	24 h	A	EC50	0.001399	20	uncoated	N/A	mineral	8.4e-06	Köser et al. 2017	10.1039/c7en00026j
FW Algae	Pseudokirchneriella subcapitata (=Raphidocelis subcapitata)	growth inhibition	72 h	C	EC50	0.00163	34	uncoated	OECD	mineral (OECD)	N/A	Ksiazyk et al. 2015	10.1007/s00128-015-1505-9
FW Algae	Chlamydomonas reinhardtii	growth inhibition	72 h	C	EC50	0.01353	56.6	PVP	OECD 201	mineral (TAP)	N/A	Kwak et al. 2016	10.3109/17435390.2015.1090028
FWM Algae	Chlorococcum infusionum	growth inhibition	72 h	C	EC50	0.00068	56.6	PVP	OECD 201	mineral (MHW)	N/A	Kwak et al. 2016	10.3109/17435390.2015.1090028
FW Algae	Chlamydomonas reinhardtii	growth inhibition	72 h	C	-	0.00215	56.6	PVP	OECD 201	mineral (TAP)	N/A	Kwak et al. 2016	10.3109/17435390.2015.1090028
FWM Algae	Chlorococcum infusionum	growth inhibition	72 h	C	-	0.0001	56.6	PVP	OECD 201	mineral (MHW)	N/A	Kwak et al. 2016	10.3109/17435390.2015.1090028
FW Algae	Pseudokirchneriella subcapitata (=Raphidocelis subcapitata)	growth inhibition	48 h	A	EC50	5.4e-06	10	PEG	OECD	mineral (OECD)	3.15e-06	Malysheva et al. 2016	10.1021/acs.est.6b03470
FW Algae	Pseudokirchneriella subcapitata (=Raphidocelis subcapitata)	growth inhibition	48 h	A	EC50	2.313e-05	10	citrate	OECD	mineral (OECD)	3.15e-06	Malysheva et al. 2016	10.1021/acs.est.6b03470
M Algae	Ceramium tenuicorne	growth inhibition	7 d	C	EC50	2.66e-05	5-10	PVP		mineral (ISO)	0.0023122	Macken et al. 2012	10.1016/j.ecoenv.2012.08.025
FW Algae	Pseudokirchneriella subcapitata (=Raphidocelis subcapitata)	growth inhibition	48 h	A	EC50	2.292e-05	10	BPEI	OECD	mineral (OECD)	3.15e-06	Malysheva et al. 2016	10.1021/acs.est.6b03470
FW Algae	Pseudokirchneriella subcapitata (=Raphidocelis subcapitata)	growth inhibition	48 h	A	EC50	1.194e-05	30	PEG	OECD	mineral (OECD)	3.15e-06	Malysheva et al. 2016	10.1021/acs.est.6b03470
FW Algae	Pseudokirchneriella subcapitata (=Raphidocelis subcapitata)	growth inhibition	48 h	A	EC50	3.828e-05	30	citrate	OECD	mineral (OECD)	3.15e-06	Malysheva et al. 2016	10.1021/acs.est.6b03470
FW Algae	Pseudokirchneriella subcapitata (=Raphidocelis subcapitata)	growth inhibition	48 h	A	EC50	6.71e-05	30	BPEI	OECD	mineral (OECD)	3.15e-06	Malysheva et al. 2016	10.1021/acs.est.6b03470
FW Algae	Pseudokirchneriella subcapitata (=Raphidocelis subcapitata)	growth inhibition	48 h	A	EC50	6.652e-05	70	PEG	OECD	mineral (OECD)	3.15e-06	Malysheva et al. 2016	10.1021/acs.est.6b03470
FW Algae	Pseudokirchneriella subcapitata (=Raphidocelis subcapitata)	growth inhibition	48 h	A	EC50	0.0001181	70	citrate	OECD	mineral (OECD)	3.15e-06	Malysheva et al. 2016	10.1021/acs.est.6b03470
FW Algae	Pseudokirchneriella subcapitata (=Raphidocelis subcapitata)	growth inhibition	48 h	A	EC50	0.0003074	70	BPEI	OECD	mineral (OECD)	3.15e-06	Malysheva et al. 2016	10.1021/acs.est.6b03470
FW Algae	Pseudokirchneriella subcapitata (=Raphidocelis subcapitata)	growth inhibition	96 h	C	IC50	0.0016	25.4	uncoated	US EPA 821‐R‐02‐013	complex (Prairie Creek Preserve)	N/A	McLaughlin and Bonzongo 2012	10.1002/etc.720
FW Algae	Pseudokirchneriella subcapitata (=Raphidocelis subcapitata)	growth inhibition	96 h	C	IC50	4.61e-06	25.4	uncoated	US EPA 821‐R‐02‐013	mineral (synthetic culture medium)	N/A	McLaughlin and Bonzongo 2012	10.1002/etc.720
FW Algae	Pseudokirchneriella subcapitata (=Raphidocelis subcapitata)	growth inhibition	96 h	C	IC50	2.26e-05	25.4	uncoated	US EPA 821‐R‐02‐013	complex (Ichetucknee River)	N/A	McLaughlin and Bonzongo 2012	10.1002/etc.720
FW Algae	Pseudokirchneriella subcapitata (=Raphidocelis subcapitata)	growth inhibition	72 h	C	EC50	5.36e-06	8.4	PVP	N/A	mineral (AAP)	2.52e-06	Mertens et al. 2019	10.1002/etc.4463
FW Algae	Euglena gracilis	photosynthetic yield	1 h	A	EC50	0.000200404	20	citrate	OECD	complex	9.1681e-06	Moreno-Garrido et al. 2015	10.1016/j.marenvres.2015.05.008
FW Algae	Euglena gracilis	photosynthetic yield	2 h	A	EC50	0.000160388	20	citrate	OECD	complex	9.59954e-06	Moreno-Garrido et al. 2015	10.1016/j.marenvres.2015.05.008
FWM Algae	Chlorococcum infusionum	growth inhibition	72 h	C	EC50	0.0001	57	PVP	OECD 201	mineral (MHW)	N/A	Nam et al. 2019	10.1016/j.ecoenv.2018.10.082
FW Algae	Chlamydomonas reinhardtii	growth inhibition	1 h	A	EC50	0.00036	25	carbonate	N/A	mineral	2e-05	Navarro et al. 2008	10.1021/es801785m
FW Algae	Chlamydomonas reinhardtii	growth inhibition	2 h	A	EC50	0.00011	25	carbonate	N/A	mineral	2e-05	Navarro et al. 2008	10.1021/es801785m
FW Algae	Chlamydomonas reinhardtii	growth inhibition	3 h	A	EC50	9.5e-05	25	carbonate	N/A	mineral	N/A	Navarro et al. 2008	10.1021/es801785m
FW Algae	Chlamydomonas reinhardtii	growth inhibition	5 h	A	EC50	8.9e-05	25	carbonate	N/A	mineral	N/A	Navarro et al. 2008	10.1021/es801785m
FW Algae	Chlamydomonas reinhardtii	growth inhibition	4 h	A	EC50	8.6e-05	25	carbonate	N/A	mineral	N/A	Navarro et al. 2008	10.1021/es801785m
FW Algae	Chlamydomonas reinhardtii	photosynthetic yield	1 h	A	EC50	0.000566265	17	citrate	N/A	mineral (synthetic culture medium)	1.94148e-05	Navarro et al. 2015	10.1021/acs.est.5b01089
FW Algae	Chlamydomonas reinhardtii	photosynthetic yield	1 h	A	EC50	0.000350545	25	CHI	N/A	mineral (synthetic culture medium)	1.94148e-05	Navarro et al. 2015	10.1021/acs.est.5b01089
FW Algae	Chlamydomonas reinhardtii	photosynthetic yield	1 h	A	EC50	0.000217877	35	LAC	N/A	mineral (synthetic culture medium)	1.94148e-05	Navarro et al. 2015	10.1021/acs.est.5b01089
FW Algae	Chlamydomonas reinhardtii	photosynthetic yield	1 h	A	EC50	0.000314951	40	carbonate	N/A	mineral (synthetic culture medium)	1.94148e-05	Navarro et al. 2015	10.1021/acs.est.5b01089
FW Algae	Chlamydomonas reinhardtii	photosynthetic yield	1 h	A	EC50	0.000509099	42	GEL	N/A	mineral (synthetic culture medium)	1.94148e-05	Navarro et al. 2015	10.1021/acs.est.5b01089
FW Algae	Chlamydomonas reinhardtii	photosynthetic yield	1 h	A	EC50	0.000405554	45	SDBS	N/A	mineral (synthetic culture medium)	1.94148e-05	Navarro et al. 2015	10.1021/acs.est.5b01089
FW Algae	Chlamydomonas reinhardtii	photosynthetic yield	1 h	A	EC50	0.000128353	70	PEG	N/A	mineral (synthetic culture medium)	1.94148e-05	Navarro et al. 2015	10.1021/acs.est.5b01089
FW Algae	Chlamydomonas reinhardtii	photosynthetic yield	1 h	A	EC50	8.52094e-05	84	PVP	N/A	mineral (synthetic culture medium)	1.94148e-05	Navarro et al. 2015	10.1021/acs.est.5b01089
FW Algae	Chlamydomonas reinhardtii	photosynthetic yield	1 h	A	EC50	3.02008e-05	456	DEX	N/A	mineral (synthetic culture medium)	1.94148e-05	Navarro et al. 2015	10.1021/acs.est.5b01089
FW Algae	Scenedesmus acuminatus	growth inhibition	96 h	C	EC50	3.85e-05	9.8	N/A	OECD 202	mineral (COMBO)	N/A	Pham 2019	10.4194/1303-2712-v19_12_03
M Algae	Chaetoceros gracilis	growth inhibition	96 h	C	EC50	2.43e-05	9.8	N/A		mineral (COMBO)	N/A	Pham 2019	10.4194/1303-2712-v19_12_03
FW Algae	Scenedesmus sp. (Chlorophyceae)	growth inhibition	72 h	C	EC50	8.992e-05	6-10	PVA	OECD 202	mineral (COMBO)	N/A	Pham 2019	10.1155/2019/9658386
M Algae	Thalassiosira sp. (Bacillariophyceae)	growth inhibition	72 h	C	EC50	0.00010721	6-10	PVA		mineral (COMBO)	N/A	Pham 2019	10.1155/2019/9658386
FW Algae	Pseudokirchneriella subcapitata (=Raphidocelis subcapitata)	growth inhibition	24 h	A	EC50	3.24e-05	7.5	alkane	OECD 201	mineral (MHW) ASTM	3.379e-05	Ribeiro et al. 2014	10.1016/j.scitotenv.2013.06.101
FW Algae	Chlamydomonas reinhardtii	photosynthetic yield	1 h	A	EC50	0.00077492	10.67	protein (Vitelinato)	N/A	nanopure water	8.3987e-05	Salas et al. 2019	10.1016/j.scitotenv.2019.07.237
FW Algae	Chlamydomonas reinhardtii	photosynthetic yield	2 h	A	EC50	0.000788169	10.67	protein (Vitelinato)	N/A	nanopure water	8.02571e-05	Salas et al. 2019	10.1016/j.scitotenv.2019.07.237
FW Algae	Chlamydomonas reinhardtii	photosynthetic yield	1 h	A	EC50	0.0116679	12.93	protein (Colargol)	N/A	nanopure water	8.3987e-05	Salas et al. 2019	10.1016/j.scitotenv.2019.07.237
FW Algae	Chlamydomonas reinhardtii	photosynthetic yield	2 h	A	EC50	0.010006	12.93	protein (Colargol)	N/A	nanopure water	8.02571e-05	Salas et al. 2019	10.1016/j.scitotenv.2019.07.237
FW Algae	Chlamydomonas reinhardtii	photosynthetic yield	1 h	A	EC50	0.0252041	17.96	protein (Proteinato)	N/A	nanopure water	8.3987e-05	Salas et al. 2019	10.1016/j.scitotenv.2019.07.237
FW Algae	Chlamydomonas reinhardtii	photosynthetic yield	2 h	A	EC50	0.0206114	17.96	protein (Proteinato)	N/A	nanopure water	8.02571e-05	Salas et al. 2019	10.1016/j.scitotenv.2019.07.237
M Algae	Phaeodactylum tricornutum	growth inhibition	72 h	C	EC50	6e-05	5.08	PVP/PEI		mineral (ASW)	N/A	Schiavo et al. 2017	10.1016/j.scitotenv.2016.10.051
M Algae	Tetraselmis suecica	growth inhibition	72 h	C	EC50	5.2e-06	5.08	PVP/PEI		mineral (ASW)	N/A	Schiavo et al. 2017	10.1016/j.scitotenv.2016.10.051
M Algae	Isochrysis galbana	growth inhibition	72 h	C	EC50	3.9e-05	5.08	PVP/PEI		mineral (ASW)	N/A	Schiavo et al. 2017	10.1016/j.scitotenv.2016.10.051
M Algae	Phaeodactylum tricornutum	growth inhibition	72 h	C	EC50	0.00472	47.2	uncoated		mineral (ASW)	N/A	Schiavo et al. 2017	10.1016/j.scitotenv.2016.10.051
M Algae	Tetraselmis suecica	growth inhibition	72 h	C	EC50	0.0041	47.2	uncoated		mineral (ASW)	N/A	Schiavo et al. 2017	10.1016/j.scitotenv.2016.10.051
M Algae	Isochrysis galbana	growth inhibition	72 h	C	EC50	0.0033	47.2	uncoated		mineral (ASW)	N/A	Schiavo et al. 2017	10.1016/j.scitotenv.2016.10.051
FW Algae	Chlamydomonas reinhardtii	growth inhibition	72 h	C	EC50	1e-05	16.7	N/A	OECD	mineral (AFW)	N/A	Sendra et al. 2017	10.1016/j.chemosphere.2017.03.123
M Algae	Phaeodactylum tricornutum	growth inhibition	72 h	C	EC50	0.0001625	16.7	N/A		mineral (AFW)	N/A	Sendra et al. 2017	10.1016/j.chemosphere.2017.03.123
M Algae	Ulva rigida C. Agardh	growth inhibition	24 h	A	EC50	0.0001	35	citrate		mineral (ASW)	5e-05	Sfriso et al. 2019	10.1016/j.envint.2019.104942
FW Algae	Pseudokirchneriella subcapitata (=Raphidocelis subcapitata)	growth inhibition	72 h	C	EC50	0.00074	5	citrate	OECD 201	mineral (OECD)	N/A	Sohn et al. 2015	10.1155/2015/893049
FW Algae	Pseudokirchneriella subcapitata (=Raphidocelis subcapitata)	growth inhibition	48 h	A	EC50	0.00014	15	uncoated	OECD	mineral (ISO)	4.9e-06	Sorensen and Baun 2015	10.3109/17435390.2014.913728
FW Algae	Pseudokirchneriella subcapitata (=Raphidocelis subcapitata)	14C assimilation	2 h	A	EC50	5e-05	15	uncoated	OECD	mineral (ISO)	6e-06	Sorensen and Baun 2015	10.3109/17435390.2014.913728
FW Algae	Pseudokirchneriella subcapitata (=Raphidocelis subcapitata)	growth inhibition	48 h	A	EC50	0.00031	30	citrate	OECD	mineral (ISO)	4.9e-06	Sorensen and Baun 2015	10.3109/17435390.2014.913728
FW Algae	Pseudokirchneriella subcapitata (=Raphidocelis subcapitata)	growth inhibition	48 h	A	EC50	7.5e-05	30	citrate	OECD	mineral (ISO)	4.9e-06	Sorensen and Baun 2015	10.3109/17435390.2014.913728
FW Algae	Pseudokirchneriella subcapitata (=Raphidocelis subcapitata)	14C assimilation	2 h	A	EC50	0.00071	30	citrate	OECD	mineral (ISO)	6e-06	Sorensen and Baun 2015	10.3109/17435390.2014.913728
FW Algae	Pseudokirchneriella subcapitata (=Raphidocelis subcapitata)	14C assimilation	2 h	A	EC50	0.00015	30	citrate	OECD	mineral (ISO)	6e-06	Sorensen and Baun 2015	10.3109/17435390.2014.913728
FW Algae	Chlamydomonas reinhardtii	growth inhibition	72 h	C	EC50	0.001819	50	PVP	OECD 201	mineral (MBL Woodshole medium)	4.3e-05	Taylor et al. 2016	10.1039/c5en00183h
FW Algae	Chlamydomonas reinhardtii	growth inhibition	72 h	C	EC50	0.000993	3-8	alkane	OECD 201	mineral (MBL Woodshole medium)	4.3e-05	Taylor et al. 2016	10.1039/c5en00183h
FW Algae	Desmodesmus subspicatus	growth inhibition	48 h	A	EC50	6.8e-05	15	coated (proprietary)	OECD 201	mineral (OECD)	N/A	Voelker et al. 2015	10.1016/j.envres.2015.05.011
FW Algae	Pseudokirchneriella subcapitata (=Raphidocelis subcapitata)	immobilization	4.5 h	A	EC50	0.0008964	15	coated (proprietary)	OECD 202	mineral (RHFW)	3.12823e-05	Wang et al. 2012	10.1002/etc.1964
FW Algae	Pseudokirchneriella subcapitata (=Raphidocelis subcapitata)	immobilization	4.5 h	A	EC50	0.021094	35	uncoated	OECD 202	mineral (RHFW)	3.12823e-05	Wang et al. 2012	10.1002/etc.1964
FW Algae	Pseudokirchneriella subcapitata (=Raphidocelis subcapitata)	immobilization	4.5 h	A	EC50	0.00400629	80	PVP	OECD 202	mineral (RHFW)	3.12823e-05	Wang et al. 2012	10.1002/etc.1964
FW Algae	Pseudokirchneriella subcapitata (=Raphidocelis subcapitata)	photosynthetic yield	4.5 h	A	EC50	0.00298664	200	PVP	OECD 202	complex	1.6179e-05	Wang et al. 2015	10.1002/etc.2936
FW Algae	Chlamydomonas reinhardtii	mortality	48 h	A	LC50	0.000605	70	PEG, Si, Ami-Si	N/A	mineral	N/A	Wu et al. 2017	10.1039/C6EN00324A
FW Algae	Microcystis aeruginosa	growth inhibition	96 h	C	EC50	1.08e-07	10	citrate	OECD	mineral (OECD)	N/A	Xiang et al. 2018	10.1007/s10661-018-7022-7
FW Algae	Microcystis aeruginosa	growth inhibition	10 d	C	EC50	0.0001354	10	citrate	OECD	mineral (OECD)	N/A	Xiang et al. 2018	10.1007/s10661-018-7022-7
FWM Algae	Chlorella sp.	growth inhibition	48 h	A	EC50	0.00089	84	N/A	OECD 201	mineral (OECD)	0.00039	Yoo-iam et al. 2014	10.3184/095422914X14144332205573
FW Algae	Euglena gracilis	photosynthetic yield	24 h	A	EC50	0.000185	19.4	citrate	N/A	mineral	1e-05	Yue et al. 2017	10.1186/s12951-017-0254-9
FW Algae	Microcystis aeruginosa	growth inhibition	96 h	C	LC50	0.00013	23.4	PVP	N/A	mineral (HGZ-145)	N/A	Zhang et al. 2018	10.1039/C8EN00738A
FW Algae	Chlorella vulgaris	growth inhibition	72 h	C	EC50	7e-05	22.03	citrate	OECD 201	mineral (OECD)	N/A	Zhang et al. 2020	10.1016/j.chemosphere.2020.125936
FW Algae	Chlorella vulgaris	growth inhibition	72 h	C	EC50	5e-05	28.98	PEI	OECD 201	mineral (OECD)	N/A	Zhang et al. 2020	10.1016/j.chemosphere.2020.125936
FW Algae	Chlorella pyrenoidosa	growth inhibition	96 h	C	IC50	3.92e-05	19	citrate	OECD	mineral (OECD)	1.2e-05	Zhou et al. 2016	10.1038/srep32998
FW Algae	Chlorella pyrenoidosa	growth inhibition	96 h	C	IC50	0.00014	22	PVP	OECD	mineral (OECD)	1.2e-05	Zhou et al. 2016	10.1038/srep32998
FW Algae	Scenedesmus quadricauda	growth inhibition	96 h	C	EC50	0.002	5	N/A	N/A	mineral (Knopp medium)	0.001	Zouzelka et al. 2016	10.1007/s11356-016-6361-6
FW Algae	Chlorella vulgaris	growth inhibition	96 h	C	EC50	0.001	5	N/A	N/A	mineral (Knopp medium)	0.0011	Zouzelka et al. 2016	10.1007/s11356-016-6361-6
FW Algae	Scenedesmus quadricauda	growth inhibition	96 h	C	EC50	0.0051	20	N/A	N/A	mineral (Knopp medium)	0.001	Zouzelka et al. 2016	10.1007/s11356-016-6361-6
FW Algae	Chlorella vulgaris	growth inhibition	96 h	C	EC50	0.002	20	N/A	N/A	mineral (Knopp medium)	0.0011	Zouzelka et al. 2016	10.1007/s11356-016-6361-6
FW Algae	Scenedesmus quadricauda	growth inhibition	96 h	C	EC50	0.004	37	N/A	N/A	mineral (Knopp medium)	0.001	Zouzelka et al. 2016	10.1007/s11356-016-6361-6
FW Algae	Chlorella vulgaris	growth inhibition	96 h	C	EC50	0.005	37	N/A	N/A	mineral (Knopp medium)	0.0011	Zouzelka et al. 2016	10.1007/s11356-016-6361-6
FW Algae	Scenedesmus quadricauda	growth inhibition	96 h	C	EC50	0.008	43	N/A	N/A	mineral (Knopp medium)	0.001	Zouzelka et al. 2016	10.1007/s11356-016-6361-6
FW Algae	Chlorella vulgaris	growth inhibition	96 h	C	EC50	0.0023	43	N/A	N/A	mineral (Knopp medium)	0.0011	Zouzelka et al. 2016	10.1007/s11356-016-6361-6
FW Algae	Scenedesmus quadricauda	growth inhibition	96 h	C	EC50	0.0076	70	N/A	N/A	mineral (Knopp medium)	0.001	Zouzelka et al. 2016	10.1007/s11356-016-6361-6
FW Algae	Chlorella vulgaris	growth inhibition	96 h	C	EC50	0.0045	70	N/A	N/A	mineral (Knopp medium)	0.0011	Zouzelka et al. 2016	10.1007/s11356-016-6361-6

## Sheet: Fish
General Environment & Taxa	Species	Endpoint	Exposure Time (h: hour(s), d: day(s))	Acute/Chronic (Based on USEtox)	LC50/EC50/IC50	In vivo/in vitro	LC50/EC50/IC50 (kg Ag/m3)	Average Size (nm)	Coating	Method	Test Medium	LC50/EC50/IC50 for Ag(+) (kg Ag/m3) (regardless of size)	Reference	DOI
FW Fish	Oreochromis niloticus	mortality	96 h	A	LC50	in vivo	0.0195	<100	PVP	US EPA	water	N/A	Afifi et al. 2016	10.1016/j.sjbs.2016.06.008
FW Fish	Tilapia zillii	mortality	96 h	A	LC50	in vivo	0.02	<100	PVP	US EPA	water	N/A	Afifi et al. 2016	10.1016/j.sjbs.2016.06.008
FW Fish	Oreochromis niloticus	mortality	24 h	A	LC50	in vivo	0.0265	<100	PVP	US EPA	water	N/A	Afifi et al. 2016	10.1016/j.sjbs.2016.06.008
FW Fish	Tilapia zillii	mortality	24 h	A	LC50	in vivo	0.0269	<100	PVP	US EPA	water	N/A	Afifi et al. 2016	10.1016/j.sjbs.2016.06.008
FW Fish	Oreochromis niloticus	mortality	48 h	A	LC50	in vivo	0.024	<100	PVP	US EPA	water	N/A	Afifi et al. 2016	10.1016/j.sjbs.2016.06.008
FW Fish	Tilapia zillii	mortality	48 h	A	LC50	in vivo	0.0246	<100	PVP	US EPA	water	N/A	Afifi et al. 2016	10.1016/j.sjbs.2016.06.008
FW Fish	Danio rerio (zebrafish)	inhibition of hatchability	48 h	A	EC50	in vitro	7.2e-05	21.5	PEG	OECD 236	mineral	3.4e-05	Asmonaite et al. 2016	10.1016/j.aquatox.2016.01.013
FW Fish	Danio rerio (zebrafish)	mortality	48 h	A	LC50	in vivo	0.000306	21.5	PEG	OECD 236	mineral	0.000235	Asmonaite et al. 2016	10.1016/j.aquatox.2016.01.013
FWM Fish	Acipenser persicus (Persian sturgeon)	mortality	96 h	A	LC50	in vivo	0.00089	16.6	N/A	OECD 203	mineral (FW)	N/A	Banan et al. 2020	10.1007/s11356-020-07687-7
FWM Fish	Acipenser persicus (Persian sturgeon)	mortality	96 h	A	LC50	in vivo	0.00183	16.6	N/A	OECD 203	mineral (brackish water)	N/A	Banan et al. 2020	10.1007/s11356-020-07687-7
FW Fish	Poecilia reticulata (Guppy fish)	mortality	24 h	A	LC50	in vivo	0.0039	9.4	N/A	N/A	mineral	0.00039	Banumathi et al. 2017	10.1007/s10876-017-1201-5
FW Fish	Poeciliopsis lucida (topminnow fish)	metabolic activity	24 h	A	EC50	in vitro	0.00876	20	uncoated	OECD	complex (culture)	0.00137	Bermejo-Nogales et al. 2016	10.1016/j.cbpc.2016.08.004
FW Fish	Poeciliopsis lucida (topminnow fish)	cell membrane integrity	24 h	A	EC50	in vitro	0.03452	20	uncoated	OECD	complex (culture)	0.00088	Bermejo-Nogales et al. 2016	10.1016/j.cbpc.2016.08.004
FW Fish	Poeciliopsis lucida (topminnow fish)	lysosomal functioning	24 h	A	EC50	in vitro	0.01488	20	uncoated	OECD	complex (culture)	0.00065	Bermejo-Nogales et al. 2016	10.1016/j.cbpc.2016.08.004
FW Fish	Danio rerio (zebrafish)	mortality	48 h	A	LC50	in vivo	8.4e-05	81	PVP	OECD	mineral (OECD)	2.5e-05	Bilberg et al. 2012	10.1155/2012/293784
FW Fish	Danio rerio (zebrafish)	mortality	48 h	A	LC50	in vivo	8.9e-05	81	PVP	OECD	mineral (OECD)	2.8e-05	Bilberg et al. 2012	10.1155/2012/293784
FW Fish	Poecilia reticulata (Guppy fish)	mortality	24 h	A	LC50	in vivo	0.00913	76	N/A	N/A	water	N/A	Borase et al. 2014	10.1002/bab.1189
FW Fish	Danio rerio (zebrafish)	mortality	96 h	A	LC50	in vivo	0.00431	30.7	maltose/gelatine	OECD 236	mineral (OECD)	5.844e-05	Caloudova et al. 2018	ISSN: 0172-780X; ISSN-L: 0172-780X; Electronic/Online ISSN: 2354-4716
FW Fish	Danio rerio (zebrafish)	mortality	96 h	A	LC50	in vivo	0.1	58.4	PVP	OECD 236	mineral (OECD)	5.844e-05	Caloudova et al. 2018	ISSN: 0172-780X; ISSN-L: 0172-780X; Electronic/Online ISSN: 2354-4716
FW Fish	Oryzias latipes (Japanese medaka)	mortality	96 h	A	LC50	in vivo	3.46e-05	49.6	N/A	US EPA 712/C-96/118	water	3.65e-05	Chae et al. 2009	10.1016/j.aquatox.2009.07.019
FW Fish	Oryzias latipes (Japanese medaka)	lethality	96 h	A	LC50	in vivo	0.00084	8.3	citrate	OECD 203	mineral (OECD)	N/A	Cho et al. 2013	10.1155/2013/494671
FW Fish	Oryzias latipes (Japanese medaka)	lethality	96 h	A	LC50	in vivo	0.0008	8.3	citrate	OECD 203	mineral (OECD)	N/A	Cho et al. 2013	10.1155/2013/494671
FW Fish	Danio rerio (zebrafish)	mortality and delayed hatching	24 h	A	LC50	in vitro	0.25	5-20	N/A	N/A	water	N/A	Choi et al. 2010	10.1016/j.aquatox.2009.12.012
FWM Fish	Oncorhynchus mykiss (Rainbow trout)	liver cell line	24 h	A	IC50	in vitro	0.0759	20	uncoated	N/A	complex	0.011	Connolly et al. 2015	10.3390/ijerph120505386
FWM Fish	Oncorhynchus mykiss (Rainbow trout)	hepatoma cell line	24 h	A	IC50	in vitro	0.0198	20	uncoated	N/A	complex	0.0011	Connolly et al. 2015	10.3390/ijerph120505386
FWM Fish	Oncorhynchus mykiss (Rainbow trout)	fibroblast-like gonadal cell line	24 h	A	IC50	in vitro	0.0417	20	uncoated	N/A	complex	0.0028	Connolly et al. 2015	10.3390/ijerph120505386
FW Fish	Danio rerio (zebrafish)	mortality and sublethal toxicity	24 h	A	LC50	in vivo	0.00528	42	N/A	OECD 203, 210, 212	mineral (FSEW)	N/A	Cunningham et al. 2013	10.1021/es303695f
FW Fish	Danio rerio (zebrafish)	mortality and sublethal toxicity	48 h	A	LC50	in vivo	0.006615	42	N/A	OECD 203, 210, 212	mineral (FSEW)	N/A	Cunningham et al. 2013	10.1021/es303695f
FW Fish	Danio rerio (zebrafish)	mortality and sublethal toxicity	24 h	A	LC50	in vivo	0.015146	46	citrate	OECD 203, 210, 212	mineral (FSEW)	N/A	Cunningham et al. 2013	10.1021/es303695f
FW Fish	Danio rerio (zebrafish)	mortality and sublethal toxicity	48 h	A	LC50	in vivo	0.018395	46	citrate	OECD 203, 210, 212	mineral (FSEW)	N/A	Cunningham et al. 2013	10.1021/es303695f
FW Fish	Danio rerio (zebrafish)	mortality and sublethal toxicity	24 h	A	LC50	in vivo	0.05741	48	gelatin	OECD 203, 210, 212	mineral (FSEW)	N/A	Cunningham et al. 2013	10.1021/es303695f
FW Fish	Danio rerio (zebrafish)	mortality and sublethal toxicity	48 h	A	LC50	in vivo	0.043497	48	gelatin	OECD 203, 210, 212	mineral (FSEW)	N/A	Cunningham et al. 2013	10.1021/es303695f
FW Fish	Danio rerio (zebrafish)	mortality and sublethal toxicity	24 h	A	LC50	in vivo	0.000464	52	PVP	OECD 203, 210, 212	mineral (FSEW)	N/A	Cunningham et al. 2013	10.1021/es303695f
FW Fish	Danio rerio (zebrafish)	mortality and sublethal toxicity	48 h	A	LC50	in vivo	0.000406	52	PVP	OECD 203, 210, 212	mineral (FSEW)	N/A	Cunningham et al. 2013	10.1021/es303695f
FW Fish	Danio rerio (zebrafish)	mortality and sublethal toxicity	24 h	A	LC50	in vivo	0.006162	53	thiol	OECD 203, 210, 212	mineral (FSEW)	N/A	Cunningham et al. 2013	10.1021/es303695f
FW Fish	Danio rerio (zebrafish)	mortality and sublethal toxicity	48 h	A	LC50	in vivo	0.010527	53	thiol	OECD 203, 210, 212	mineral (FSEW)	N/A	Cunningham et al. 2013	10.1021/es303695f
FW Fish	Danio rerio (zebrafish)	mortality and sublethal toxicity	24 h	A	LC50	in vivo	0.003455	77	N/A	OECD 203, 210, 212	mineral (FSEW)	N/A	Cunningham et al. 2013	10.1021/es303695f
FW Fish	Danio rerio (zebrafish)	mortality and sublethal toxicity	48 h	A	LC50	in vivo	0.003091	77	N/A	OECD 203, 210, 212	mineral (FSEW)	N/A	Cunningham et al. 2013	10.1021/es303695f
FW Fish	Danio rerio (zebrafish)	mortality and sublethal toxicity	24 h	A	LC50	in vivo	8.45e-05	108	thiol	OECD 203, 210, 212	mineral (FSEW)	N/A	Cunningham et al. 2013	10.1021/es303695f
FW Fish	Danio rerio (zebrafish)	mortality and sublethal toxicity	48 h	A	LC50	in vivo	3.45e-05	108	thiol	OECD 203, 210, 212	mineral (FSEW)	N/A	Cunningham et al. 2013	10.1021/es303695f
FW Fish	Danio rerio (zebrafish)	mortality and sublethal toxicity	24 h	A	LC50	in vivo	0.006922	110	citrate	OECD 203, 210, 212	mineral (FSEW)	N/A	Cunningham et al. 2013	10.1021/es303695f
FW Fish	Danio rerio (zebrafish)	mortality and sublethal toxicity	48 h	A	LC50	in vivo	0.002427	110	citrate	OECD 203, 210, 212	mineral (FSEW)	N/A	Cunningham et al. 2013	10.1021/es303695f
FW Fish	Danio rerio (zebrafish)	mortality and sublethal toxicity	24 h	A	LC50	in vivo	6.1e-05	140	PVP	OECD 203, 210, 212	mineral (FSEW)	N/A	Cunningham et al. 2013	10.1021/es303695f
FW Fish	Danio rerio (zebrafish)	mortality and sublethal toxicity	48 h	A	LC50	in vivo	0.000228	140	PVP	OECD 203, 210, 212	mineral (FSEW)	N/A	Cunningham et al. 2013	10.1021/es303695f
FW Fish	Danio rerio (zebrafish)	mortality and sublethal toxicity	24 h	A	LC50	in vivo	0.005891	155	gelatin	OECD 203, 210, 212	mineral (FSEW)	N/A	Cunningham et al. 2013	10.1021/es303695f
FW Fish	Danio rerio (zebrafish)	mortality and sublethal toxicity	48 h	A	LC50	in vivo	0.003043	155	gelatin	OECD 203, 210, 212	mineral (FSEW)	N/A	Cunningham et al. 2013	10.1021/es303695f
FW Fish	Oryzias melastigma	cell viability	48 h	A	EC50	in vitro	7.25e-06	46.6	PVP	N/A	complex (culture)	4.2e-05	Degger et al. 2015	10.1016/j.aquatox.2015.10.015
FW Fish	Oryzias melastigma	cell viability	48 h	A	EC50	in vitro	0.0009244	74.2	oleic acid	N/A	complex (culture)	4.2e-05	Degger et al. 2015	10.1016/j.aquatox.2015.10.015
FWM Fish	Oncorhynchus mykiss (Rainbow trout)	inhibition of metabolic activity	48 h	A	EC50	in vitro	0.0026	1-10	citrate	N/A	complex (culture)	0.0011	Farkas et al. 2010	10.1016/j.aquatox.2009.09.016
FWM Fish	Oncorhynchus mykiss (Rainbow trout)	membrane stability	48 h	A	EC50	in vitro	0.0035	1-10	citrate	N/A	complex (culture)	0.0139	Farkas et al. 2010	10.1016/j.aquatox.2009.09.016
FWM Fish	Oncorhynchus mykiss (Rainbow trout)	inhibition of metabolic activity	48 h	A	EC50	in vitro	0.0025	1-10	citrate	N/A	mineral (culture)	0.0011	Farkas et al. 2010	10.1016/j.aquatox.2009.09.016
FWM Fish	Oncorhynchus mykiss (Rainbow trout)	membrane stability	48 h	A	EC50	in vitro	0.0049	1-10	citrate	N/A	mineral (culture)	0.0139	Farkas et al. 2010	10.1016/j.aquatox.2009.09.016
FW Fish	Oreochromis mossambicus	mortality	8 d	SC	LC50	in vitro	0.0126	60-80	citrate	N/A	water	N/A	Govindasamy and Rahuman 2012	10.1016/S1001-0742(11)60845-0
FW Fish	Danio rerio (zebrafish)	mortality and/or immobilization	48 h	A	LC50	in vivo	0.00707	26.6	metal oxide	US EPA 821/R-02/013	mineral (MHFW)	2.22e-05	Griffitt et al. 2008	10.1897/08-002.1
FW Fish	Danio rerio (zebrafish)	mortality and/or immobilization	48 h	A	LC50	in vivo	0.0072	26.6	metal oxide	US EPA 821/R-02/013	mineral (MHFW)	>1.00E-02	Griffitt et al. 2008	10.1897/08-002.1
FW Fish	Danio rerio (zebrafish)	immobilization	96 h	A	EC50	in vivo	2.445e-05	21	PVP	OECD 236	complex (lake)	1.549e-05	Heinlaan et al. 2016	10.1016/j.envpol.2016.06.033
FW Fish	Pimephales promelas	mortality and growh inhibition	96 h	A	LC50	in vivo	8.94e-05	10	uncoated	US EPA 600/4-90/027F, US EPA 821/R-02/013	water	4.7e-06	Hoheisel et al. 2012	10.1002/etc.1978
FW Fish	Danio rerio (zebrafish)	not specified	72 h	A	EC50	in vivo	0.000536	15	uncoated	OECD 236	mineral (OECD)	N/A	Hund-Rinke et al. 2018	10.1016/j.impact.2017.10.003
FW Fish	Danio rerio (zebrafish)	not specified	72 h	A	EC50	in vivo	0.000203	44	uncoated	OECD 236	mineral (OECD)	N/A	Hund-Rinke et al. 2018	10.1016/j.impact.2017.10.003
FW Fish	Danio rerio (zebrafish)	not specified	72 h	A	EC50	in vivo	0.0204	241	uncoated	OECD 236	mineral (OECD)	N/A	Hund-Rinke et al. 2018	10.1016/j.impact.2017.10.003
FW Fish	Hypophthalmichthys molitrix	mortality	96 h	A	LC50	in vivo	0.0664	<100	N/A	N/A	water	N/A	Jahanbakhshi et al. 2012	10.5829/idosi.wjfms.2012.04.04.63107
FW Fish	Carassius auratus (Goldfish)	mortality	96 h	A	LC50	in vivo	0.0839	<100	N/A	N/A	water	N/A	Jahanbakhshi et al. 2012	10.5829/idosi.wjfms.2012.04.04.63107
FW Fish	Hypophthalmichthys molitrix	mortality	24 h	A	LC50	in vivo	0.113	<100	N/A	N/A	water	N/A	Jahanbakhshi et al. 2012	10.5829/idosi.wjfms.2012.04.04.63107
FW Fish	Carassius auratus (Goldfish)	mortality	24 h	A	LC50	in vivo	0.144	<100	N/A	N/A	water	N/A	Jahanbakhshi et al. 2012	10.5829/idosi.wjfms.2012.04.04.63107
FW Fish	Hypophthalmichthys molitrix	mortality	48 h	A	LC50	in vivo	0.101	<100	N/A	N/A	water	N/A	Jahanbakhshi et al. 2012	10.5829/idosi.wjfms.2012.04.04.63107
FW Fish	Carassius auratus (Goldfish)	mortality	48 h	A	LC50	in vivo	0.144	<100	N/A	N/A	water	N/A	Jahanbakhshi et al. 2012	10.5829/idosi.wjfms.2012.04.04.63107
FW Fish	Hypophthalmichthys molitrix	mortality	72 h	A	LC50	in vivo	0.087	<100	N/A	N/A	water	N/A	Jahanbakhshi et al. 2012	10.5829/idosi.wjfms.2012.04.04.63107
FW Fish	Carassius auratus (Goldfish)	mortality	72 h	A	LC50	in vivo	0.101	<100	N/A	N/A	water	N/A	Jahanbakhshi et al. 2012	10.5829/idosi.wjfms.2012.04.04.63107
FW Fish	Danio rerio (zebrafish)	mortality	24 h	A	LC50	in vivo	8.4e-05	20.4	PVP	OECD 236	mineral	4.5e-05	Jemec et al. 2016	10.1016/j.envint.2015.10.014
FW Fish	Danio rerio (zebrafish)	mortality	48 h	A	LC50	in vivo	6.6e-05	20.4	PVP	OECD 236	mineral	3.2e-05	Jemec et al. 2016	10.1016/j.envint.2015.10.014
FW Fish	Poecilia reticulata (Guppy fish)	mortality	48 h	A	LC50	in vivo	0.0383	8.2	N/A	OECD, US EPA	water (SSF)	0.0182	Jenifer et al. 2019	10.1007/s10876-019-01704-7
FW Fish	Poecilia reticulata (Guppy fish)	mortality	96 h	A	LC50	in vivo	0.0345	8.2	N/A	OECD, US EPA	water (SSF)	0.0141	Jenifer et al. 2019	10.1007/s10876-019-01704-7
FWM Fish	Oncorhynchus mykiss (Rainbow trout)	mortality	96 h	A	LC50	in vivo	0.00025	16.6	N/A	OECD 215	dechlorinated tap water	N/A	Johari et al. 2013	Iranian Journal of Fisheries Sciences 12(1)76 -95
FWM Fish	Oncorhynchus mykiss (Rainbow trout)	mortality	96 h	A	LC50	in vivo	0.00071	16.6	N/A	OECD 215	dechlorinated tap water	N/A	Johari et al. 2013	Iranian Journal of Fisheries Sciences 12(1)76 -95
FWM Fish	Oncorhynchus mykiss (Rainbow trout)	mortality	96 h	A	LC50	in vivo	0.00216	16.6	N/A	OECD 215	dechlorinated tap water	N/A	Johari et al. 2013	Iranian Journal of Fisheries Sciences 12(1)76 -95
FWM Fish	Oncorhynchus mykiss (Rainbow trout)	mortality	24 h	A	LC50	in vivo	0.00275	16.6	N/A	OECD 215	dechlorinated tap water	N/A	Johari et al. 2013	Iranian Journal of Fisheries Sciences 12(1)76 -95
FWM Fish	Oncorhynchus mykiss (Rainbow trout)	mortality	24 h	A	LC50	in vivo	0.00109	16.6	N/A	OECD 215	dechlorinated tap water	N/A	Johari et al. 2013	Iranian Journal of Fisheries Sciences 12(1)76 -95
FWM Fish	Oncorhynchus mykiss (Rainbow trout)	mortality	24 h	A	LC50	in vivo	0.00376	16.6	N/A	OECD 215	dechlorinated tap water	N/A	Johari et al. 2013	Iranian Journal of Fisheries Sciences 12(1)76 -95
FWM Fish	Oncorhynchus mykiss (Rainbow trout)	mortality	48 h	A	LC50	in vivo	0.00044	16.6	N/A	OECD 215	dechlorinated tap water	N/A	Johari et al. 2013	Iranian Journal of Fisheries Sciences 12(1)76 -95
FWM Fish	Oncorhynchus mykiss (Rainbow trout)	mortality	48 h	A	LC50	in vivo	0.00102	16.6	N/A	OECD 215	dechlorinated tap water	N/A	Johari et al. 2013	Iranian Journal of Fisheries Sciences 12(1)76 -95
FWM Fish	Oncorhynchus mykiss (Rainbow trout)	mortality	48 h	A	LC50	in vivo	0.00313	16.6	N/A	OECD 215	dechlorinated tap water	N/A	Johari et al. 2013	Iranian Journal of Fisheries Sciences 12(1)76 -95
FWM Fish	Oncorhynchus mykiss (Rainbow trout)	mortality	72 h	A	LC50	in vivo	0.00035	16.6	N/A	OECD 215	dechlorinated tap water	N/A	Johari et al. 2013	Iranian Journal of Fisheries Sciences 12(1)76 -95
FWM Fish	Oncorhynchus mykiss (Rainbow trout)	mortality	72 h	A	LC50	in vivo	0.00096	16.6	N/A	OECD 215	dechlorinated tap water	N/A	Johari et al. 2013	Iranian Journal of Fisheries Sciences 12(1)76 -95
FWM Fish	Oncorhynchus mykiss (Rainbow trout)	mortality	72 h	A	LC50	in vivo	0.00239	16.6	N/A	OECD 215	dechlorinated tap water	N/A	Johari et al. 2013	Iranian Journal of Fisheries Sciences 12(1)76 -95
FWM Fish	Oncorhynchus mykiss (Rainbow trout)	mortality	24 h	A	LC50	in vivo	0.00376	196.1	N/A	OECD 215	dechlorinated tap water	N/A	Kalbassi et al. 2013	journals.modares.ac.ir/files/ecopersia/user_files_749497/archive_global-A-24-1000-5650-da48918.pdf
FWM Fish	Oncorhynchus mykiss (Rainbow trout)	mortality	48 h	A	LC50	in vivo	0.00313	196.1	N/A	OECD 215	dechlorinated tap water	N/A	Kalbassi et al. 2013	journals.modares.ac.ir/files/ecopersia/user_files_749497/archive_global-A-24-1000-5650-da48918.pdf
FWM Fish	Oncorhynchus mykiss (Rainbow trout)	mortality	72 h	A	LC50	in vivo	0.00239	196.1	N/A	OECD 215	dechlorinated tap water	N/A	Kalbassi et al. 2013	journals.modares.ac.ir/files/ecopersia/user_files_749497/archive_global-A-24-1000-5650-da48918.pdf
FWM Fish	Oncorhynchus mykiss (Rainbow trout)	mortality	96 h	A	LC50	in vivo	0.00216	196.1	N/A	OECD 215	dechlorinated tap water	N/A	Kalbassi et al. 2013	journals.modares.ac.ir/files/ecopersia/user_files_749497/archive_global-A-24-1000-5650-da48918.pdf
FW Fish	Oryzias latipes (Japanese medaka)	mortality	96 h	A	LC50	in vivo	0.00139	3.6	N/A	N/A	water	N/A	Kashiwada et al. 2012	10.1021/es2045647
FW Fish	Danio rerio (zebrafish)	mortality	24 h	A	LC50	in vivo	0.02973	83.58	uncoated	OECD	mineral (OECD)	N/A	Katuli et al. 2015	10.1016/j.ecoenv.2014.04.001
FW Fish	Danio rerio (zebrafish)	mortality	48 h	A	LC50	in vivo	0.02743	83.58	uncoated	OECD	mineral (OECD)	N/A	Katuli et al. 2015	10.1016/j.ecoenv.2014.04.001
FW Fish	Danio rerio (zebrafish)	mortality	72 h	A	LC50	in vivo	0.02425	83.58	uncoated	OECD	mineral (OECD)	N/A	Katuli et al. 2015	10.1016/j.ecoenv.2014.04.001
FW Fish	Danio rerio (zebrafish)	mortality	96 h	A	LC50	in vivo	0.01676	83.58	uncoated	OECD	mineral (OECD)	N/A	Katuli et al. 2015	10.1016/j.ecoenv.2014.04.001
FW Fish	Pimephales promelas	mortality	48 h	A	LC50	in vivo	4.1e-05	10	N/A	US EPA 812/R-02/013	mineral (MHRW)	6.26e-06	Kennedy et al. 2010	10.1021/es1025382
FW Fish	Pimephales promelas	mortality	48 h	A	LC50	in vivo	6.41e-05	20	N/A	US EPA 812/R-02/013	mineral (MHRW)	6.26e-06	Kennedy et al. 2010	10.1021/es1025382
FW Fish	Pimephales promelas	mortality	48 h	A	LC50	in vivo	1.92e-05	29	citrate	US EPA 812/R-02/013	mineral (MHRW)	6.26e-06	Kennedy et al. 2010	10.1021/es1025382
FW Fish	Pimephales promelas	mortality	48 h	A	LC50	in vivo	9e-06	31	N/A	US EPA 812/R-02/013	mineral (MHRW)	6.26e-06	Kennedy et al. 2010	10.1021/es1025382
FW Fish	Pimephales promelas	mortality	48 h	A	LC50	in vivo	5.52e-05	36	N/A	US EPA 812/R-02/013	mineral (MHRW)	6.26e-06	Kennedy et al. 2010	10.1021/es1025382
FW Fish	Pimephales promelas	mortality	48 h	A	LC50	in vivo	>6.99E-05	41	PVP	US EPA 812/R-02/013	mineral (MHRW)	6.26e-06	Kennedy et al. 2010	10.1021/es1025382
FW Fish	Pimephales promelas	mortality	48 h	A	LC50	in vivo	6.07e-05	50	N/A	US EPA 812/R-02/013	mineral (MHRW)	6.26e-06	Kennedy et al. 2010	10.1021/es1025382
FW Fish	Pimephales promelas	mortality	48 h	A	LC50	in vivo	0.000125	80	N/A	US EPA 812/R-02/013	mineral (MHRW)	6.26e-06	Kennedy et al. 2010	10.1021/es1025382
FW Fish	Cyprinus carpio (common carp)	mortality	96 h	A	LC50	in vivo	0.00029	25	N/A	OECD 203	mineral (OECD)	0.00015	Khosravi-Katuli et al. 2018	10.1016/j.jhazmat.2018.07.064
FW Fish	Cyprinus carpio (common carp)	mortality	24 h	A	LC50	in vivo	0.00043	25	N/A	OECD 203	mineral (OECD)	0.00038	Khosravi-Katuli et al. 2018	10.1016/j.jhazmat.2018.07.064
FW Fish	Cyprinus carpio (common carp)	mortality	48 h	A	LC50	in vivo	0.00031	25	N/A	OECD 203	mineral (OECD)	0.00021	Khosravi-Katuli et al. 2018	10.1016/j.jhazmat.2018.07.064
FW Fish	Cyprinus carpio (common carp)	mortality	72 h	A	LC50	in vivo	0.00029	25	N/A	OECD 203	mineral (OECD)	0.00016	Khosravi-Katuli et al. 2018	10.1016/j.jhazmat.2018.07.064
FW Fish	Oryzias latipes (Japanese medaka)	mortality	96 h	A	LC50	in vivo	2.8e-05	60	uncoated	OECD 203	mineral (M4)	5e-07	Kim et al. 2011	10.3109/17435390.2010.508137
FW Fish	Oryzias latipes (Japanese medaka)	mortality	96 h	A	LC50	in vivo	6.7e-05	300	uncoated	OECD 203	mineral (M4)	5e-07	Kim et al. 2011	10.3109/17435390.2010.508137
FW Fish	Danio rerio (zebrafish)	abnormality	48 h	A	EC50	in vivo	1.11	56.6	PVP	OECD 212	mineral (ERS without methylene blue)	N/A	Kwak et al. 2016	10.3109/17435390.2015.1090028
FW Fish	Oryzias latipes (Japanese medaka)	abnormality	7 d	SC	EC50	in vivo	0.00289	56.6	PVP	OECD 236	mineral (ERS with methylene blue)	N/A	Kwak et al. 2016	10.3109/17435390.2015.1090028
FW Fish	Danio rerio (zebrafish)	abnormality	7 d	SC	-	in vivo	0.000398	56.6	PVP	OECD 236	mineral (ERS without methylene blue)	N/A	Kwak et al. 2016	10.3109/17435390.2015.1090028
FW Fish	Oryzias latipes (Japanese medaka)	abnormality	16 d	SC	-	in vivo	0.000608	56.6	PVP	OECD 236	mineral (ERS with methylene blue)	N/A	Kwak et al. 2016	10.3109/17435390.2015.1090028
FW Fish	Pimephales promelas	mortality	96 h	A	LC50	in vivo	0.0094	35	N/A	N/A	mineral	1.5e-05	Laban et al. 2010	10.1007/s10646-009-0404-4
FW Fish	Pimephales promelas	mortality	96 h	A	LC50	in vivo	0.0106	51-60	N/A	N/A	mineral	1.5e-05	Laban et al. 2010	10.1007/s10646-009-0404-4
FW Fish	Rutilus kutum	mortality	96 h	A	LC50	in vivo	2.8e-05	16.6	N/A	OECD 215	mineral (OECD)	N/A	Masouleh et al. 2017	10.1007/s10661-017-6156-3
FWM Fish	Oncorhynchus mykiss (Rainbow trout)	metabolic activity	24 h	A	EC50	in vitro	0.00125118	19	citrate	N/A	complex (Leibovitz)	0.000140218	Minghetti and Schirmer 2016	10.1080/17435390.2016.1241908
FWM Fish	Oncorhynchus mykiss (Rainbow trout)	cell membrane integrity	24 h	A	EC50	in vitro	0.00211406	19	citrate	N/A	complex (Leibovitz)	0.000226506	Minghetti and Schirmer 2016	10.1080/17435390.2016.1241908
FWM Fish	Oncorhynchus mykiss (Rainbow trout)	lysosome membrane integrity	24 h	A	EC50	in vitro	0.00048537	19	citrate	N/A	complex (Leibovitz)	0.000302008	Minghetti and Schirmer 2016	10.1080/17435390.2016.1241908
FW Fish	Danio rerio (zebrafish)	growth inhibition	48 h	A	EC50	in vivo	0.00109	20	N/A	OECD 203	mineral (OECD)	7.3e-05	Muth-Kohne et al. 2013	10.1007/s10646-013-1114-5
FW Fish	Danio rerio (zebrafish)	growth inhibition	24 h	A	EC50	in vivo	0.00113	20	N/A	OECD 203	mineral (OECD)	9e-05	Muth-Kohne et al. 2013	10.1007/s10646-013-1114-5
FW Fish	Danio rerio (zebrafish)	mortality	24 h	A	LC50	in vivo	0.00179	20	N/A	OECD 203	mineral (OECD)	0.00012	Muth-Kohne et al. 2013	10.1007/s10646-013-1114-5
FW Fish	Danio rerio (zebrafish)	mortality	48 h	A	LC50	in vivo	0.00126	20	N/A	OECD 203	mineral (OECD)	0.0001	Muth-Kohne et al. 2013	10.1007/s10646-013-1114-5
FW Fish	Danio rerio (zebrafish)	mortality	48 h	A	LC50	in vivo	0.00624	18	coated (proprietary)	N/A	mineral	N/A	Olasagasti et al. 2014	10.1002/jat.2975
FW Fish	Danio rerio (zebrafish)	mortality	48 h	A	LC50	in vivo	0.00094	18	coated (proprietary)	N/A	water	0.000163	Olasagasti et al. 2014	10.1002/jat.2975
FW Fish	Danio rerio (zebrafish)	mortality	5 d	A	LC50	in vivo	5e-05	5	PVP/PEI	OECD 236	mineral (OECD)	N/A	Orbea et al. 2017	10.1016/j.cbpc.2017.03.004
FW Fish	Danio rerio (zebrafish)	mortality	48 h	A	LC50	in vivo	5.7e-05	5	PVP/PEI	OECD 236	mineral (OECD)	N/A	Orbea et al. 2017	10.1016/j.cbpc.2017.03.004
FW Fish	Acipenser baerii (Siberian sturgeon)	mortality	96 h	A	LC50	in vivo	0.01503	8.02	PVP	N/A	water	N/A	Ostaszewska et al. 2016	10.1007/s11356-015-5391-9
FW Fish	Labeo rohita	mortality	96 h	A	LC50	in vivo	0.003474	27	PVP	OECD 203	mineral (OECD)	N/A	Paul et al. 2016	Indian Journal of Animal Sciences 86 (8): 964–971
FW Fish	Labeo rohita	mortality	96 h	A	LC50	in vivo	0.002334	103	PVP	OECD 203	mineral (OECD)	N/A	Paul et al. 2016	Indian Journal of Animal Sciences 86 (8): 964–971
FW Fish	Labeo rohita	mortality	7 d	SC	LC50	in vivo	0.0001	96	citrate	N/A	water	N/A	Rajkumar et al. 2016	10.1007/s13204-015-0417-7
FW Fish	Danio rerio (zebrafish)	mortality	96 h	A	LC50	in vivo	0.02522	<100	lamarin	OECD 203	mineral (OECD)	N/A	Renuka et al. 2020	10.1007/s10876-019-01632-6
FW Fish	Danio rerio (zebrafish)	mortality	96 h	A	LC50	in vivo	0.01993	<100	PVP	OECD 203	mineral (OECD)	N/A	Renuka et al. 2020	10.1007/s10876-019-01632-6
FW Fish	Danio rerio (zebrafish)	mortality	24 h	A	LC50	in vivo	0.0001284	7.5	alkane	OECD	mineral (MHW) ASTM	7.832e-05	Ribeiro et al. 2014	10.1016/j.scitotenv.2013.06.101
FWM Fish	Oncorhynchus mykiss (Rainbow trout)	mortality	48 h	A	LC50		0.0035	N/A	N/A		water	N/A	Shahbazzadeh et al. 2009	10.3923/pjn.2009.1178.1179
FWM Fish	Oncorhynchus mykiss (Rainbow trout)	mortality	72 h	A	LC50		0.003	N/A	N/A		water	N/A	Shahbazzadeh et al. 2009	10.3923/pjn.2009.1178.1179
FWM Fish	Oncorhynchus mykiss (Rainbow trout)	mortality	96 h	A	LC50		0.0023	N/A	N/A		water	N/A	Shahbazzadeh et al. 2009	10.3923/pjn.2009.1178.1179
FW Fish	Hypophthalmichthys molitrix	mortality	24 h	A	LC50	in vivo	0.00081	61	N/A	OECD	dechlorinated tap water	N/A	Shaluei et al. 2013	10.1177/0960327113485258
FW Fish	Hypophthalmichthys molitrix	mortality	48 h	A	LC50	in vivo	0.000648	61	N/A	OECD	dechlorinated tap water	N/A	Shaluei et al. 2013	10.1177/0960327113485258
FW Fish	Hypophthalmichthys molitrix	mortality	72 h	A	LC50	in vivo	0.000383	61	N/A	OECD	dechlorinated tap water	N/A	Shaluei et al. 2013	10.1177/0960327113485258
FW Fish	Hypophthalmichthys molitrix	mortality	96 h	A	LC50	in vivo	0.000202	61	N/A	OECD	dechlorinated tap water	N/A	Shaluei et al. 2013	10.1177/0960327113485258
FW Fish	Danio rerio (zebrafish)	mortality	6 d	A	LC50	in vivo	5.86e-05	15	uncoated	OECD 210	mineral (OECD)	5e-06	Shaw et al. 2016	10.1007/s00204-016-1734-7
FW Fish	Danio rerio (zebrafish)	mortality	96 h	A	LC50	in vivo	0.0001372	15	uncoated	OECD 210	mineral (OECD)	6.05e-06	Shaw et al. 2016	10.1007/s00204-016-1734-7
FW Fish	Labeo rohita	mortality	96 h	A	LC50	in vivo	2.5e-05	50	N/A	N/A	water	N/A	Shobana et al. 2018	10.1007/s11356-018-1454-z
FW Fish	Oryzias latipes (Japanese medaka)	mortality	96 h	A	LC50	in vivo	0.0018	5	citrate	OECD 203	mineral	N/A	Sohn et al. 2015	10.1155/2015/893049
FW Fish	Oreochromis niloticus	mortality	24 h	A	LC50	in vivo	0.053	10-20	N/A	N/A	water	N/A	Srinonate et al. 2015	Thai J Vet Med. 2015. 45(1): 81-89
FW Fish	Gibelion catla (Catla)	mortality	96 h	A	LC50	in vivo	0.0127	50	N/A	OECD 203	mineral (OECD)	0.0036	Taju et al. 2014	10.1016/j.cbpc.2014.01.007
FW Fish	Labeo rohita	mortality	96 h	A	LC50	in vivo	0.01228	50	N/A	OECD 203	mineral (OECD)	0.00401	Taju et al. 2014	10.1016/j.cbpc.2014.01.007
FW Fish	Gibelion catla (Catla)	heart cell line	24 h	A	EC50	in vitro	0.02077	50	N/A	OECD 203	complex (Leibovitz)	0.00398	Taju et al. 2014	10.1016/j.cbpc.2014.01.007
FW Fish	Gibelion catla (Catla)	gill cell line	24 h	A	EC50	in vitro	0.01864	50	N/A	OECD 203	complex (Leibovitz)	0.00371	Taju et al. 2014	10.1016/j.cbpc.2014.01.007
FW Fish	Labeo rohita	gill cell line	24 h	A	EC50	in vitro	0.02154	50	N/A	OECD 203	complex (Leibovitz)	0.00401	Taju et al. 2014	10.1016/j.cbpc.2014.01.007
FW Fish	Chapalichthys pardalis	mortality	96 h	A	LC50	in vivo	0.01032	11.95	PVP	OECD 203	mineral (OECD)	N/A	Valerio-Garcia et al. 2017	10.1016/j.scitotenv.2017.01.070
FW Fish	Danio rerio (zebrafish)	mortality	48 h	A	EC50	in vivo	0.00078	15	coated (proprietary)	OECD	mineral (OECD)	N/A	Voelker et al. 2015	10.1016/j.envres.2015.05.011
FW Fish	Danio rerio (zebrafish)	teratogenic effect	96 h	A	EC50	in vitro	8.41386e-05	15	coated (proprietary)	N/A	mineral (RHFW)	7.87451e-05	Wang et al. 2012	10.1002/etc.1964
FW Fish	Danio rerio (zebrafish)	teratogenic effect	96 h	A	EC50	in vitro	0.000173671	35	uncoated	N/A	mineral (RHFW)	7.87451e-05	Wang et al. 2012	10.1002/etc.1964
FW Fish	Danio rerio (zebrafish)	teratogenic effect	96 h	A	EC50	in vitro	0.000146703	80	PVP	N/A	mineral (RHFW)	7.87451e-05	Wang et al. 2012	10.1002/etc.1964
FW Fish	Danio rerio (zebrafish)	teratogenic effect	96 h	A	EC50	in vitro	0.00187892	200	PVP	N/A	complex	4.3144e-05	Wang et al. 2015	10.1002/etc.2936
FW Fish	Oryzias latipes (Japanese medaka)	mortality	72 h	A	LC50	in vivo	0.00112	29.9	PVP	N/A	dechlorinated tap water	N/A	Wu and Zhou 2013	10.1002/etc.2038
FW Fish	Oryzias latipes (Japanese medaka)	mortality	96 h	A	LC50	in vivo	0.00087	29.9	PVP	N/A	dechlorinated tap water	N/A	Wu and Zhou 2013	10.1002/etc.2038
FW Fish	Oryzias latipes (Japanese medaka)	mortality	48 h	A	LC50	in vivo	0.00103	25	PVP	N/A	water	N/A	Wu et al. 2010	10.1016/j.aquatox.2009.11.014
FW Fish	Oryzias latipes (Japanese medaka)	mortality	48 h	A	LC50	in vivo	0.00138	29.9	PVP	N/A	dechlorinated tap water	N/A	Wu et al. 2013	10.1002/etc.2038
FW Fish	Danio rerio (zebrafish)	mortality	48 h	A	LC50	in vivo	0.000434	70	PEG, Si, Ami-Si	N/A	mineral	N/A	Wu et al. 2017	10.1039/C6EN00324A
FW Fish	Cyprinus carpio (common carp)	mortality	24 h	A	LC50	in vivo	0.00159	11.5	PVP	OECD 203	mineral (OECD)	0.00013	Xiang et al. 2020	10.1016/j.envpol.2019.113504
FW Fish	Cyprinus carpio (common carp)	mortality	48 h	A	LC50	in vivo	0.00155	11.5	PVP	OECD 203	mineral (OECD)	0.00011	Xiang et al. 2020	10.1016/j.envpol.2019.113504
FW Fish	Cyprinus carpio (common carp)	mortality	72 h	A	LC50	in vivo	0.00153	11.5	PVP	OECD 203	mineral (OECD)	0.0001	Xiang et al. 2020	10.1016/j.envpol.2019.113504
FW Fish	Cyprinus carpio (common carp)	mortality	96 h	A	LC50	in vivo	0.00153	11.5	PVP	OECD 203	mineral (OECD)	0.0001	Xiang et al. 2020	10.1016/j.envpol.2019.113504
FW Fish	Danio rerio (zebrafish)	mortality	96 h	A	LC50	in vivo	0.0061	10	citrate	N/A	mineral (AFW)	N/A	Yen et al. 2019	10.1016/j.aquatox.2019.105273
FW Fish	Barbonymus gonionotus (Silver barb)	mortality	48 h	A	LC50	in vivo	0.00176	84	N/A	OECD 203	mineral (OECD)	5.7e-05	Yoo-iam et al. 2014	10.3184/095422914X14144332205573
FWM Fish	Oncorhynchus mykiss (Rainbow trout)	metabolic activity	24 h	A	EC50	in vitro	0.00136982	19.4	citrate	N/A	complex (Leibovitz)	8.6288e-05	Yue et al. 2015	10.3109/17435390.2014.889236
FWM Fish	Oncorhynchus mykiss (Rainbow trout)	cell membrane integrity	24 h	A	EC50	in vitro	0.00155318	19.4	citrate	N/A	complex (Leibovitz)	9.7074e-05	Yue et al. 2015	10.3109/17435390.2014.889236
FWM Fish	Oncorhynchus mykiss (Rainbow trout)	lysosome membrane integrity	24 h	A	EC50	in vitro	0.00105703	19.4	citrate	N/A	complex (Leibovitz)	6.4716e-05	Yue et al. 2015	10.3109/17435390.2014.889236
FWM Fish	Oncorhynchus mykiss (Rainbow trout)	metabolic activity	24 h	A	EC50	in vitro	0.0415	19.4	citrate	N/A	mineral	0.00525	Yue et al. 2017	10.1186/s12951-017-0254-9

## Sheet: Protozoa
General Environment & Taxa	Species	Endpoint	Exposure Time (h: hour(s), d: day(s))	Acute/Chronic (Based on USEtox)	LC50/EC50/IC50	LC50/EC50/IC50 (kg Ag/m3)	Average Size (nm)	Coating	Test Medium	LC50/EC50/IC50 for Ag(+) (kg Ag/m3) (regardless of size)	Reference	DOI
FW Protozoa	Paramecium tetraurelia	mortality	20 h	A	LC50	0.00234	20	N/A	complex (axenic broth culture)	0.00073	Burkart et al. 2015	10.1007/s11356-014-4057-3
FW Protozoa	Paramecium tetraurelia	inhibition	20 h	A	EC50	0.00259	20	N/A	complex (axenic broth culture)	0.00076	Burkart et al. 2015	10.1007/s11356-014-4057-3
FW Protozoa	Tetrahymena sp.	mortality	1 h	A	LC50	7.96e-07	35	PVP	deionized water	N/A	Fuentes-Valencia et al. 2020	10.1016/j.exppara.2019.107825
FW Protozoa	Tetrahymena sp.	mortality	1 h	A	LC50	1e-09	1-3	N/A	deionized water	N/A	Fuentes-Valencia et al. 2020	10.1016/j.exppara.2019.107825
FW Protozoa	Tetrahymena thermophila	ATP concentration	2 h	A	EC50	0.0032	20.4	PVP	mineral	0.0029	Jemec et al. 2016	10.1016/j.envint.2015.10.014
FW Protozoa	Tetrahymena thermophila	ATP concentration	24 h	A	EC50	0.0039	20.4	PVP	mineral	0.0029	Jemec et al. 2016	10.1016/j.envint.2015.10.014
FWM Protozoa	Paramecium	mortality	1 h	A	LC50	0.0155	8.2	N/A	water (SSF)	0.0112	Jenifer et al. 2019	10.1007/s10876-019-01704-7
FW Protozoa	Tetrahymena thermophila	viability (ATP content)	2 h	A	EC50	0.286	<100	uncoated	MilliQ water	0.0018	Juganson et al. 2013	10.1039/C2EM30731F
FW Protozoa	Tetrahymena thermophila	viability (ATP content)	24 h	A	EC50	0.205	<100	uncoated	MilliQ water	0.0015	Juganson et al. 2013	10.1039/C2EM30731F
FW Protozoa	Tetrahymena thermophila	ATP concentration	2 h	A	EC50	0.085	14.6	casein	MilliQ water	0.002	Juganson et al. 2017	10.1016/j.envpol.2017.03.013
FW Protozoa	Tetrahymena thermophila	ATP concentration	24 h	A	EC50	0.0895	14.6	casein	MilliQ water	0.0027	Juganson et al. 2017	10.1016/j.envpol.2017.03.013
FW Protozoa	Paramecium caudatum	mortality	1 h	A	LC50	0.03	40	uncoated	water	N/A	Kvitek et al. 2009	10.1021/jp808645e
FW Protozoa	Paramecium caudatum	mortality	1 h	A	LC50	0.016	40	N/A	water	N/A	Kvitek et al. 2009	10.1021/jp808645e
FW Protozoa	Paramecium caudatum	mortality	1 h	A	LC50	0.038	40	PEG	water	N/A	Kvitek et al. 2009	10.1021/jp808645e
FW Protozoa	Paramecium caudatum	mortality	1 h	A	LC50	0.036	40	PVP	water	N/A	Kvitek et al. 2009	10.1021/jp808645e
M Protozoa	Euplotes vannus	mortality	12 h	A	LC50	0.03001	73.82	uncoated	mineral (ASW)	0.00218	Pan et al. 2018	10.1039/C8EN00924D
FW Protozoa	Tetrahymena pyriformis	growth inhibition	24 h	A	EC50	0.001463	9	ATP	complex (axenic broth culture)	N/A	Shi et al. 2012	10.1002/etc.1864

## Sheet: Abbreviations
AAP	algal assay procedure
AFW	artificial freshwater
Ami-Si	aminated silica
ASW	artificial saltwater
BBM	Bold’s basal medium
BLCFE	Bacillus licheniformis cell free extract
BPEI	branched polyethyleneimine
CHI	chitosan
CPA	carboxy-functionalized polyacrylate
DEX	dexpanthenol
ERS	embryonic rearing solution
FNSW	filtered natural seawater
FSEW	filter sterilized egg water
FW	freshwater
FWM	freshwater/marine
GEL	gelatin
HA	humic acid
LAC	lactate
M	marine
M4	Elendt’s M4 medium
M7	Elendt M7 medium
MHFW	moderately hard freshwater
MHRW	moderately hard reconstituted water
MHW	moderately hard water
MOPS	3-(N-morpholino)propanesulfonic acid
PEG	polyethylene glycol
PEI	polyethylenimine
PVA	polyvinyl alcohol
PVP	poly-N-vynil-2-pirrolidone
PVP/PEI	poly-N-vynil-2-pirrolidone and polyethylenimine
RHFW	reconstituted hard freshwater
SA	sodium alginate
SDBS	sodium dodecylbenzene sulfonate
Si	silica
SM7	simplified M7 medium
SSF	standard synthetic freshwater by EPA
TAP	tris-acetate-phosphate
VSRW	very soft reconstituted water
